1  
2  
3  
4  
5  
6  
7  
8  
9  
10  
11  
12  
13  
14  
15  
16  
17  
18  
19  
20  
21  
22  
23  
24  
25  
26

**Health and economic impact of caregiving on informal caregivers of people with chronic diseases in Sub-Saharan Africa: A systematic review**

Ephraim Kisangala<sup>1\*</sup>, Etheldreda Leinyuy Mbivnjo<sup>2</sup>, Edward JD Webb<sup>3</sup>, Barbara Barrett<sup>1</sup>, Godfrey Zari Rukundo<sup>4</sup>, Eve Namisango<sup>5</sup>, Margaret Heslin<sup>1</sup>

1. King's Health Economics, Institute of Psychiatry, Psychology and Neuroscience at King's College London, London, UK
2. Infectious Disease Epidemiology, Epidemiology and Population Health, London School of Hygiene and Tropical Medicine, London, UK
3. Academic Unit of Health Economics, Leeds Institute of Health Sciences, University of Leeds, Leeds, UK
4. Department of Psychiatry, Mbarara University of Science and Technology, Mbarara, Uganda
5. African Palliative Care Association, Kampala, Uganda

\*Corresponding author

Email: [ephraim.1.kisangala@kcl.ac.uk](mailto:ephraim.1.kisangala@kcl.ac.uk)

## 27 **Abstract**

28 **Background:** With a disproportionate burden of chronic diseases and severe shortage of health  
29 workers in sub-Saharan Africa (SSA), the region implicitly relies on informal caregivers (ICGs)  
30 to support the patients both within and outside the health facilities. The aim of this review is to  
31 explore the health and economic impact of caregiving on ICGs of patients with chronic diseases  
32 in SSA.

33 **Methods:** Medline (Ovid), CINAHL (EBSCOhost), PsycINFO (Ovid), Embase (Ovid), Global  
34 Health and Web of Science databases were systematically searched to identify original articles  
35 that considered the economic and/or health impacts of caregiving in SSA. The results from the  
36 included studies were synthesised narratively.

37 **Results:** After screening 4,372 articles, 47 were included for synthesis. The articles were from  
38 all sub-regions of SSA with more than half (25/47) of the articles focussing on caregivers for  
39 patients with cancer. Although the primary motivation for becoming caregivers was love and  
40 responsibility, the caring responsibilities described in twenty articles, had profound effects on  
41 the caregiver's lives. Healthwise, ICGs experienced changes in their physical and mental health  
42 like developing musculoskeletal problems and depression. Economically, caregiving was  
43 expensive, and financially draining. The opportunity cost of caregiving included loss of jobs,  
44 loss of income, foregoing planned important activities and missed education opportunities.

45 **Conclusion:** ICGs reported a range of mainly negative health and economic effects of the work  
46 they do. Health care systems should consider how to better support ICGs in terms of their own  
47 physical and mental wellbeing and governments should consider how to better financially  
48 support ICGs.

49 **Key Words:**

50 Informal caregivers, sub-Saharan Africa, chronic diseases

## 52 **Introduction**

53 Global increases in healthcare expenditure have not been proportional across the world (1). In  
54 sub-Saharan Africa (SSA), government spending on health is very low whilst out-of-pocket  
55 expenditure is significantly high. These countries do not have well-developed health insurance  
56 system and the out-of-pocket health expenditure is sometimes higher than 70% (2,3). Universal  
57 health insurance is still in its infancy in SSA, with only four countries having coverage levels  
58 above 20% (3,4). Therefore, the family (informal caregiver) of a person with a chronic disease  
59 in this region is often faced with a double burden of because of the long-term nature of the disease  
60 and the limited availability of diagnostic and disease management services (5). Chronic diseases  
61 which are projected to be the leading cause of morbidity and mortality in Africa by 2030 are  
62 slow-progressing diseases that last long in the body and cannot be transmitted from one person  
63 to another (6,7).

64 The term informal caregiver (ICG) is used to refer to any layperson who provides regular  
65 emotional, physical, financial, and medical support to the sick or to people with disabilities, often  
66 without expectation of an immediate reward (8,9). Throughout this review, ‘ICG’ and ‘caregiver’  
67 are used interchangeably to mean the same thing unless otherwise specified. Many times, ICGs  
68 have a familial relationship with the care recipient, often assuming the caregiving role as parents,  
69 spouses, children, siblings, or other relatives. These caregivers are predominantly female and  
70 frequently take on the caregiving role with minimal or no preparation (10). It is understood that  
71 the ICGs in SSA perform numerous tasks, some of which are typically responsibilities of  
72 healthcare professionals in other parts of the world (10,11). They perform these activities  
73 whenever required, whether day or night, at home or in the hospital and under any situation. For  
74 example, ICGs sometimes sleep on hospital floors during the night to provide companionship  
75 and maintain close proximity to the care recipient in order to address any immediate concerns  
76 required by either the patient or the medical personnel at the hospital (12). Accordingly, they are  
77 faced with unique challenges, such as overwhelming responsibilities, high out-of-pocket health  
78 expenditure, stigma, and limited access to healthcare services (10,11).

79 Over the years, reviews have been conducted to assess the impact of caregiving in SSA. The  
80 focus of these reviews has been on specific conditions such as HIV (13), cancers (10), old age,  
81 end-of-life care (14), mental health disorders (15) and stroke. Other researchers limited their  
82 reviews to studies within specific countries (16) or specific settings like hospitals (17).

83 In this review, we aimed to systematically summarise evidence on the health and economic  
84 impact of caregiving on ICGs of patients with chronic diseases in the whole of SSA. This was  
85 achieved through the following three objectives: 1) To describe the activities ICGs of people  
86 with chronic diseases in SSA perform 2) To discuss the reasons why ICGs of people with chronic  
87 diseases in SSA took on the caregiving roles 3) To explore the health and economic impact of  
88 caregiving on ICGs of people with chronic diseases in SSA. From our understanding, this is the  
89 first review to explore how caregiving affects the health and economic aspects of caregivers of  
90 people with major chronic diseases in the whole of SSA.

## 91 **Methods**

92 This systematic review was conducted, adhering to the guidelines laid out in the Preferred  
93 Reporting Items for Systematic Reviews and Meta-Analyses (PRISMA) statement (18). The  
94 protocol for this review was registered with PROSPERO under the registration number of  
95 CRD42022358531. The databases were searched between September and October 2022.

### 96 **Eligibility criteria**

97 The criteria for selecting studies were as follows:

98 **Study design:** All original studies, irrespective of the design were included in this review.  
99 These included randomised controlled trials, case-control, cohort, cross-sectional and qualitative  
100 studies. However, commentaries and reviews were excluded.

101 **Population:** Studies with ICGs providing care to people with chronic diseases were included.  
102 We included the most common chronic diseases which are known to cause significant morbidity  
103 and over 80% of premature deaths - these were cardiovascular diseases, chronic obstructive  
104 pulmonary diseases, cancers and Type 2 diabetes (19). We excluded mental health conditions  
105 and those with a co-morbidity that is not a chronic disease of interest. We did not include studies  
106 that had less than half (50%) of ICGs in active caregiving roles. Caregivers may not actively  
107 provide care when the care recipient has significantly improved, died and when another person  
108 has taken over the caring role. We also excluded studies where results for the population of  
109 interest were pooled with others (such as professional caregivers, paid caregivers, and  
110 volunteers) and if the proportion of the population of interest was under 50%. Such studies would  
111 dilute the relevance of the findings and make them less applicable to ICGs, who are this review's

112 population of interest. Where results were presented separately for the population of interest, we  
113 included the studies regardless of what proportion of the total sample they made up.

114 **Outcomes:** The studies that were selected for inclusion in this review had findings with  
115 information about how caregiving affected the health or economic aspects of the ICG's life. Such  
116 information had to be provided in the findings.

117 **Setting:** Studies were selected if they were conducted within SSA as defined by World Bank  
118 (<https://openknowledge.worldbank.org/pages/focus-sub-saharan-africa>). The search was not  
119 restricted to any language since articles published in languages other than English were  
120 translated.

## 121 **Information sources**

122 EK searched for relevant original articles from the following databases between September and  
123 October 2022: Medline (Ovid), CINAHL (EBSCOhost), PsycINFO (Ovid), Embase (Ovid),  
124 Global Health and Web of Science. The searches were conducted from the inception of each  
125 database up to the date of each search. Full details of the searches including the databases, search  
126 strategy and the search outcomes can be found in **S1 File**.

127 In addition, the reference lists of selected articles and relevant systematic review reports were  
128 searched. Lastly, primary authors of editorial letters, abstracts from conference proceedings,  
129 abstracts without full-text articles and commentaries identified through the searches were  
130 contacted by email for full-text original articles.

## 131 **Search strategy**

132 The search strategy development process involved identifying candidate search terms by reading  
133 the titles, abstracts, keywords, and search strategies in the three known related articles (17,20,21).  
134 A draft search string was formed by appropriately combining the identified search terms and  
135 MeSH terms using Boolean operators. The search terms: Informal caregiver, sub-Saharan Africa,  
136 and Chronic Diseases, were combined using the Boolean operator "AND," while the thesauruses  
137 and MeSH words for each search term were combined using "OR." This was improved after a  
138 review and discussion with two senior researchers (BB and MH) and a librarian from King's  
139 College London, all of whom have experience in systematic reviews. This was purposely done  
140 to reduce the errors and increase the robustness of the search strategy. The final search string as  
141 used in each database can be found in **S1 File**.

## 142 **Selection process**

143 The articles that were retrieved from all the searched databases were exported to Endnote  
144 (version 20) for removal of the duplicate articles. This was done by the first reviewer (EK). The  
145 remaining articles were then transferred to Rayyan software (<https://www.rayyan.ai/>) where title  
146 and abstract screening was done. The articles that did not meet the agreed criteria were excluded  
147 while those that potentially met the eligibility criteria were included for full-text screening. Full-  
148 text screening was carried out for the articles whose full-text versions were retrieved. The articles  
149 whose full-texts were unavailable even after contacting the primary authors were excluded. At  
150 each stage, the screening was independently conducted by two reviewers. While EK screened all  
151 the articles in both stages, the second reviewer (ELM) screened a random 20% of the articles at  
152 the title and abstract screening stage, and a random 25% during the full-text screening. There  
153 was 96% agreement between the two reviewers and all disagreements were resolved by a  
154 discussion with input from other authors. In this review, all non-English papers were translated  
155 into English using Google Translate, a choice made due to its known reliability and accuracy in  
156 English with 91% agreement between native language reviewers and reviews who use google  
157 translate (range, 85% to 97%) (22).

## 158 **Quality of the included studies**

159 The quality of the articles was independently assessed by two reviewers (EK and ELM) using  
160 the Mixed Methods Appraisal Tool, a critical appraisal tool that has been tested and found to be  
161 reliable and efficient (23,24). It is used to assess the quality of studies of different designs  
162 including qualitative and quantitative studies. For each article (depending on the study design),  
163 there are five (5) questions that require a response of Yes, No or Can't Tell. In this review, the  
164 Yes was given a score of 1 and No or Can't Tell was given a score of 0. Any disagreement was  
165 resolved by consensus.

## 166 **Data extraction and analysis**

167 Relevant data was extracted from all articles by EK and entered into a data extraction form,  
168 developed with the study objectives in mind. The data that was extracted into the form included;  
169 the name of the first author of the study, the year of publication, the country where the study was  
170 conducted, study design, sample size, participants' age and sex, their marital and employment  
171 status, the relationship of ICG to the patient, activities done by the ICG, setting (home or hospital  
172 setting), type of chronic disease, scale used to measure impact, the health and economic impact

173 of caregiving on ICG and the ICGs' motivation to provide care. Thereafter, data were synthesized  
174 narratively.

175

## 176 **Results**

### 177 **Study selection**

178 As shown in the PRISMA diagram in Fig 1, 4372 records were retrieved through a systematic  
179 search of seven databases (4368) and a targeted search of the reference list of the already  
180 identified relevant articles (4). After removing 2005 duplicate articles, 2194 articles were  
181 excluded during the title and abstract screening and another 27 articles were also excluded  
182 because they were conference abstracts whose full-text articles could not be retrieved. During  
183 the full-text screening, 99 articles were excluded for various reasons and only 45 studies (with  
184 47 articles) were included in the review.

185 **Fig 1. PRISMA flow diagram of the screening and selection process in this review**

### 186 **Study characteristics**

187 All articles were written in English except one that was in French (25). The authors used  
188 qualitative and quantitative methods in 22 and 24 of the 47 articles respectively, with one article  
189 using mixed methods. Of the quantitative studies, three (26–28) were longitudinal studies and  
190 the rest had a cross-sectional study design. The articles were from fourteen countries representing  
191 all the sub-regions of SSA. The highest number of articles (11/47) were from Nigeria (29–39)  
192 and South Africa (11,26,27,40–47), while each of the following countries had one (1/47) article;  
193 Togo (48), Zimbabwe (49), Kenya (50), Sudan (51), Democratic Republic of Congo (52) and  
194 Cameroon (25). Among the articles from South Africa, two used data from the same study  
195 (42,43). Also, data from a single study in Ghana was used in two of the five articles (53,54). See

196 **Table 1**

197

198

199





201 **Table 1. Summary of the characteristics of the reviewed articles**

| Author, year                | Country      | Setting                             | Participants                                                                                                                                                               | Sample size | Disease                                                                                                                          | Relationship to Patient                                                                                                   | Duration of caring | Time spent in care                                                                                 |
|-----------------------------|--------------|-------------------------------------|----------------------------------------------------------------------------------------------------------------------------------------------------------------------------|-------------|----------------------------------------------------------------------------------------------------------------------------------|---------------------------------------------------------------------------------------------------------------------------|--------------------|----------------------------------------------------------------------------------------------------|
| Yusuf (2011) (29)           | Nigeria      | Outpatients                         | Family caregivers<br>Mean age: 57 years<br>Age range: Not reported<br>Sex: Female, 43 (42%)<br><b>Employment:</b> Unemployed 25 (24.3%)<br>Employed 78 (75.7%)             | 103         | Cancers (Not specified)                                                                                                          | Spouse: 3 (2.9%)<br>Son/daughter: 74 (71.9%)<br>Sibling: 26 (25.2%)                                                       | Not reported       | Not reported                                                                                       |
| Wassie (2022) (56)          | Ethiopia     | Admitted in hospital                | ICGs of adults<br>Mean age: 35 years<br>Age range: Not reported<br>Sex: Female, 176 (42.72%)<br><b>Employment:</b> Employed 282 (68.44%)/Unemployed 130 (31.56%)           | 412         | Breast cancer 91 (22.09%);<br>Cervical cancer 54(13.11%);<br>Gastric cancer 30(7.28%);<br>Others 237 (57.52%)                    | Spouse 140 (33.98%);<br>Child 150 (36.41%);<br>Siblings 85 (20.63%);<br>Parents 21 (5.1%);<br>Other relatives 16 (3.88%); | more than 2 weeks  | Not reported                                                                                       |
| Walubita (2018) (12)        | Zambia       | Admitted in hospital                | <b>ICGs of children with cancers</b><br>Mean age: Not reported<br>Age range: 20 to 58 years<br>Sex: Female, 14 (93.3%)<br><b>Employment:</b> Not reported                  | 15          | Cancer of the kidney (4),<br>Leukaemia (3), Retinol blastoma (3), Lymphoma (2), Cancer of the liver (1), Cancer of the lungs (1) | Parent 12;<br>Grandparent 2;<br>Great grandparent 1;                                                                      | Not reported       | Not reported                                                                                       |
| Vincent-Onabajo (2018) (30) | Nigeria      | Not institutionalised               | ICGs of people with stroke<br>Mean age: 33.2 years<br>Age range: 19 to 60 years<br>Sex: Female, 55 (61.1%)<br><b>Employment:</b> Unemployed 60 (66.7%)/Employed 30 (33.3%) | 90          | Stroke                                                                                                                           | Offspring 53 (58.9%);<br>Spouse 22 (24.4%);<br>Sibling 15 (16.7%).                                                        | Not reported       | Not reported                                                                                       |
| Thomas (2008) (40)          | South Africa | Not institutionalised               | Primary ICGs<br>Mean age: 47.2 years<br>Age range: 16 to 67 years<br>Sex: Female, Female 4 (66.7)<br>Employment: Not reported                                              | 6           | Stroke                                                                                                                           | Husbands 2 (33.3);<br>Wife 2 (33.3%);<br>Daughters 2 (33.3%)                                                              | Not reported       | Always with the care recipient                                                                     |
| Tchokote (2020) (25)        | Cameroon     | Not institutionalised               | Primary or secondary ICGs<br>Mean age: 32.75 years<br>Age range: 20 to 50 years<br>Sex: Female, Female 2 (50%)<br>Employment: Employed 1 (25%); Unemployed 3 (75%)         | 4           | Stroke                                                                                                                           | Grandchildren 2 (50%);<br>Wife 1 (25%); Daughter 1 (25%)                                                                  | Not reported       | Not reported                                                                                       |
| Serfontein (2019) (26)      | South Africa | Admitted in a Rehabilitation centre | Primary ICGs<br>Mean age: Not reported<br>Age range: 23 to 76 years<br>Sex: Female, Female 50 (79.4%)<br>Employment: Employed 30 (47.6%);<br>Unemployed 33 (52.4%)         | 63          | Cerebrovascular accident (CVA)                                                                                                   | Spouses 32 (50.8%);<br>Children 18 (28.6%);<br>Other relatives (13 20.6%)                                                 | ≥ 2 months         | 13.2% (5) spend ≥4 hours/day<br>55.6% (35) spend 2-4 hours/day &<br>23.8% (15) spent 5-6 hours/day |
| Scheffler (2019) (27)       | South Africa | Not institutionalised               | <b>ICGs [73/80 (91.2%)-ICGs; &amp; 7/80 (8.8%) paid carers]</b><br>Mean age: 47.4 years,                                                                                   | 89          | Stroke                                                                                                                           | Spouse/partner 25 (28.4%)<br>Son/daughter 33 (37.5%)                                                                      | Not reported       | Not reported                                                                                       |

|                        |         |                                          |                                                                                                                                                                   |     |                                |                                                                                                                             |                                                                                                                                                 |                                                                                                                                                                               |
|------------------------|---------|------------------------------------------|-------------------------------------------------------------------------------------------------------------------------------------------------------------------|-----|--------------------------------|-----------------------------------------------------------------------------------------------------------------------------|-------------------------------------------------------------------------------------------------------------------------------------------------|-------------------------------------------------------------------------------------------------------------------------------------------------------------------------------|
|                        |         |                                          | Age range: 12 to 79 years<br>Sex: Female, Female 73 (82.0%)<br>Employment: Not reported                                                                           |     |                                | Other family 19 (21.6%)<br>Friend 6 (6.8%)<br>Other 6 (5.7%)                                                                |                                                                                                                                                 |                                                                                                                                                                               |
| Owoo (2022) (54)       | Ghana   | Not clear                                | Family caregivers<br>Mean age: 48.67 years<br>Age range: 27 to 67 years<br>Sex: Female, Female 11 (91.67%)<br>Employment: Employed: 9 (75%); Unemployed: 3 (25%)  | 12  | Prostate cancer                | Father 6 (50%)<br>Husband 6 (50%)                                                                                           | 1 year 8 (66.67%)<br>2 years 3 (25%)<br>6 months 1 (8.33%)                                                                                      | Not reported                                                                                                                                                                  |
| Owoo (2022) (53)       | Ghana   | Not reported                             | Family caregivers<br>Mean age: 48.67 years<br>Age range: 27 to 67 years<br>Sex: Female, Female 11 (91.67%)<br>Employment: Employed: 9 (75%); Unemployed: 3 (25%)  | 12  | Prostate cancer                | Father 6 (50%)<br>Husband 6 (50%)                                                                                           | 1 year 8 (66.67%)<br>2 years 3 (25%)<br>6 months 1 (8.33%)                                                                                      | Not reported                                                                                                                                                                  |
| Onyeneho (2021) (31)   | Nigeria | Not reported                             | Primary caregiver<br>Mean age: 37.68 YEARS<br>Age range: 10 to >51 years<br>Sex: Female, Female 11 (91.67%)<br>Employment: Employed: 9 (75%); Unemployed: 3 (25%) | 182 | Cancer (Not specified)         | Brother 12 (6.6%)<br>Sister 20 (11.0%)<br>Parents 119 (65.4%)<br>Husband 17 (9.3%)<br>Wife 14 (7.7%)                        | <1 month 52 (28.6%)<br>1 month to 6 months 63 (34.6%)<br>>6 months to 1 year 21 (11.5%)<br>>1 year 46 (25.3%)<br>Mean±SD<br>2.34±1.14           | Not reported                                                                                                                                                                  |
| Okeke (2020) (32)      | Nigeria | within outpatient department of hospital | Informal caregivers<br>Mean age: 41.1 years<br>Age range: 18 to 75 years<br>Sex: Female, Female 179 (57.6%)<br>Employment: Not reported                           | 311 | Stroke                         | Parents 100 (32.1%)<br>Children 18 (5.8%)<br>Spouse 106 (34.1%)<br>Non relatives 18 (5.8%)<br>Other relatives 69 (22.2%)    | 1 to 3 months 112 (36%)<br>4 to 6 months 26 (8.3%)<br>7 to 12 months 22 (7.1%)<br>13 to 24 months 32 (10.3%)<br>More than 24 months 119 (38.3%) |                                                                                                                                                                               |
| Ohaeri (1999) (33)     | Nigeria | Outpatient                               | Informal caregivers<br>Mean age: 35.6<br>Age range: 18 to 75 years<br>Sex: Not reported<br>Employment: Employed 52 (70.4%), Unemployed 21 (29.6%);                | 73  | Cervix cancer<br>Breast cancer | Husband 24 (32.9%)<br>Child 36 (49.3%)<br>Others: 13 (17.8%)                                                                | Not reported                                                                                                                                    | Daily contact with patient 55 (75.3%)                                                                                                                                         |
| Ogunmodede (2019) (34) | Nigeria | Not institutionalised                    | Primary caregivers [1(1%) paid carers, 99 (99%) ICGs]<br>Mean age: 46.5 years<br>Age range: ≤20 to >60 years<br>Sex: Female 56 (56.0%)                            | 100 | Type 2 Diabetes Mellitus       | Parents 10 (10.0%)<br>Child 40 (40.0%)<br>Spouse 34 (34.0%)<br>Siblings 11 (11.0%)<br>Unrelated 1 (1.0%)<br>Others 4 (4.0%) | Not reported                                                                                                                                    | Daily contact 83 (83.0%)<br>Weekly contact 10 (10.0%)<br>2-3 times a month 5 (5.0%)<br>Several times a year 2 (2.0%)<br><b>Number of contact hours</b><br><= 5hours: 4 (4.0%) |

|                         |                 |                                    |                                                                                                                                                                                                             |                                                                |                                                                                                                                                                                                |                                                                                                        |                                                                                                                                    |                                                                                          |
|-------------------------|-----------------|------------------------------------|-------------------------------------------------------------------------------------------------------------------------------------------------------------------------------------------------------------|----------------------------------------------------------------|------------------------------------------------------------------------------------------------------------------------------------------------------------------------------------------------|--------------------------------------------------------------------------------------------------------|------------------------------------------------------------------------------------------------------------------------------------|------------------------------------------------------------------------------------------|
|                         |                 |                                    | Employment: Employed 66 (66.0%),<br>Unemployed 34 (34.0%)                                                                                                                                                   |                                                                |                                                                                                                                                                                                |                                                                                                        |                                                                                                                                    | 6-10 hours: 18 (18.0%)<br>11-15 ours 22 (22.0%)<br>>16 hours 31 (31.0%)                  |
| Muriuki (2023)<br>(50)  | Kenya           | Outpatient<br>clinic               | Family caregivers<br>Mean age: Not reported<br>Age range: 18 to >61 years<br>Sex: Female 147 (57.6%)<br>Employment: Employed 109 (42.8%),<br>Unemployed 146 (57.3%)                                         | 255                                                            | Cancer (not specified)                                                                                                                                                                         | Not reported                                                                                           | at least 2 weeks                                                                                                                   | Not reported                                                                             |
| Muliira (2019)<br>(57)  | Uganda          | Mixed (both out<br>and inpatients) | Family caregivers<br>Mean age: 36 years<br>Age range: 18 to >51 years<br>Sex: Female 208 (73.2%)<br>Employment: Employed 161 (56.7%),<br>Unemployed 123 (43.3%)                                             | 284                                                            | Breast cancer (18.3%), cervix<br>cancer (12.3%), and leukaemia<br>(12.3%) and others (cancers of<br>oesophagus, prostate, ovary,<br>pancreas, stomach,<br>Lymphomas, and multiple<br>myeloma). | Spouse 57 (20.1%)<br>Child 110 (38.7%)<br>Others 117 (41.2%)                                           | 7-11 months<br>135 (47.5%)<br>12-24 months<br>91 (32.1%)<br>≥25 months 58<br>(20.4%)                                               | ≤48 hours/week 57 (20.1%)<br>49-120 hours/week 92 (32.4%)<br>≥121 hours/week 135 (47.5%) |
| Mthembu<br>(2016) (41)  | South<br>Africa | Not reported                       | Informal caregivers<br>Mean age: 58.5 years<br>Age range: 24 to 79 years<br>Sex: Female 5 (83.33%)<br>Employment: Not reported                                                                              | 6                                                              | Lung Disease<br>Hypertension<br>Stroke<br>Diabetes mellitus                                                                                                                                    | Spouse 2 (33.33%)<br>Children 3 (50%)<br>Other relatives<br>(Daughter in Law) 1<br>(16.67%)            | Not reported                                                                                                                       | Not reported                                                                             |
| Mlaba (2021)<br>(43)    | South<br>Africa | Mixed                              | Informal caregivers ( <i>patients of 3 (15%) of IGCs<br/>had died</i> )<br>Mean age: 55.05 years<br>Age range: 21 to 84 years<br>Sex: Female 14 (70.0%)<br>Employment: Not reported                         | 20                                                             | Various cancers (Not specified)                                                                                                                                                                | Spouse 7 (35.0%)<br>Offspring/children 5<br>(25.0%)<br>Parent 1 (5.0%)<br>Other relatives 7<br>(35.0%) | Not reported                                                                                                                       | Not reported                                                                             |
| Mlaba (2020)<br>(42)    | South<br>Africa | Mixed                              | Informal caregivers ( <i>patients of 3 (15%) of IGCs<br/>had died</i> )<br>Mean age: 55.05 years<br>Age range: 21 to 84 years<br>Sex: Female 14 (70.0%)<br>Employment: Not reported                         | 20                                                             | Various cancers (Not specified)                                                                                                                                                                | Spouse 7 (35.0%)<br>Offspring/children 5<br>(25.0%)<br>Parent 1 (5.0%)<br>Other relatives 7<br>(35.0%) | Not reported                                                                                                                       | Not reported                                                                             |
| Mensah (2021)<br>(66)   | Ghana           | Not reported                       | Husbands of women with advanced breast<br>cancer<br>Mean age: Not reported<br>Age range: 34 to 55 years<br>Sex: Female 0 (0%) Male 15 (100%)<br>Employment: Employed 15 (100%)                              | 15                                                             | Breast cancer                                                                                                                                                                                  | Husband 15 (100%)                                                                                      | 4 to 11 months                                                                                                                     | Not reported                                                                             |
| Mekonnen<br>(2020) (61) | Ethiopia        | Not reported                       | Parents of children with cancer<br>Quantitative<br>Mean age: Not reported<br>Age range: 18 to >49 years<br>Sex: Female 145 (52.7%)<br>Employment: Not reported<br><br>Qualitative<br>Mean age: Not reported | 295<br>(Quant<br>itative<br>= 275;<br>Qualit<br>ative =<br>20) | Cancer (Not specified)                                                                                                                                                                         | Quantitative Parents<br>275 (100%);<br>and<br>Qualitative<br>Parents 20 (100%)                         | Qualitative<br>(n=275)<br>1-3 weeks 14<br>(5.1%)<br>4-6 weeks 148<br>(53.8%)<br>7-9 weeks 64<br>(23.3%)<br>≥10 weeks 49<br>(17.8%) | Not reported                                                                             |

|                         |                              |                                                        |                                                                                                                                                             |     |                                                                                                                                         |                                                                                                                      |                                                                                                                                                                                 |              |
|-------------------------|------------------------------|--------------------------------------------------------|-------------------------------------------------------------------------------------------------------------------------------------------------------------|-----|-----------------------------------------------------------------------------------------------------------------------------------------|----------------------------------------------------------------------------------------------------------------------|---------------------------------------------------------------------------------------------------------------------------------------------------------------------------------|--------------|
|                         |                              |                                                        | Age range: 36-45 years<br>Sex: Female 13 (65%)<br>Employment: Not reported                                                                                  |     |                                                                                                                                         |                                                                                                                      |                                                                                                                                                                                 |              |
| Masuku, (2018)<br>(44)  | South Africa                 | Home                                                   | Primary caregivers<br>Mean age: 38 years.<br>Age range: 21 to 65 years<br>Sex: Female 14 (100%)<br>Employment: Employed 6 (42.9%), Unemployed 8 (57.1%)     | 14  | stroke                                                                                                                                  | Children 5 (35.7%)<br>Other relatives 1 (7.1%)<br>Wife 6 (42.9%)<br>Sister 2 (14.3%)                                 | RANGE (3 months to more than 3 years)<br><= 6 months 6 (42.9%)<br>7 months to <= 12 months 3 (21.4%)<br>>12 months to <= 24 years 3 (21.4%)<br>24 months to 48 months 2 (14.3%) | Not reported |
| Masika (2020)<br>(62)   | Tanzania                     | Admitted                                               | Guardians of children<br>Mean age: 38 years<br>Age range: Not reported<br>Sex: Female 15 (68.2%)<br>Employment: Not reported                                | 22  | leukemia (5), eye cancer (5), cancer of the glands (5), kidney cancer (2), stomach cancer (1), thyroid cancer (1), and liver cancer (1) | Guardian 22 (100%)                                                                                                   | Not reported                                                                                                                                                                    | Not reported |
| Marima (2019)<br>(49)   | Zimbabwe                     | Outpatients                                            | ICGs<br>Mean age: 41.5 years<br>Age range: Not reported<br>Sex: Female 50 (70.4%)<br>Employment: Not reported                                               | 71  | Stroke                                                                                                                                  | Not reported                                                                                                         | Median (IQR) 4 (2-13) months;<br>Most had provided care for at least 4 months                                                                                                   | Not reported |
| Maree (2018)<br>(11)    | South Africa                 | Not reported                                           | Primary ICGs<br>Mean age: 41.7 years<br>Age range: 20 to 65 years<br>Sex: Female 10 (50%)<br>Employment: Not reported                                       | 20  | various cancers (Not specified)                                                                                                         | Children: 10 (50%)<br>Spouse: 4 (20%)<br>Friends/non-related: 3 (15%)<br>Other relatives: 2 (10%)<br>Sibling: 1 (5%) | Between 3 weeks and 10 years, with an average of 24.8 months (SD ± 26.9).                                                                                                       | Not reported |
| Kitoko (2022)<br>(52)   | Democratic Republic of Congo | Outpatients (follow-up visit to rehabilitation centre) | ICGs<br>Mean age: 42.3 years<br>Age range: Not reported<br>Sex: Female 58 (68.2%)<br>Employment: Employed: 54 (63.5%);<br>Unemployed: 31 (36.5%)            | 85  | Stroke                                                                                                                                  | Not reported                                                                                                         | At least 3 months                                                                                                                                                               | Not reported |
| Khondowe (2007) (68)    | Zambia                       | Outpatients                                            | Caregivers of stroke outpatients                                                                                                                            | 10  | Stroke                                                                                                                                  | Not reported                                                                                                         | Not reported                                                                                                                                                                    | Not reported |
| Ketlogetswe (2022) (45) | South Africa                 | Hospice admitted patients                              | Primary ICGs<br>Mean age: 52 years<br>Age range: 23 to 84 years<br>Sex: Female 19 (86.36%)<br>Employment: Employed: 10 (45.45%);<br>Unemployed: 12 (54.54%) | 22  | cancers of head, neck, prostate, thyroid, breast, lung, vulva, & blood                                                                  | mostly mothers of the sick person, but also included partners, sons, daughters and a neighbour (No statistic given)  | 13 months on average                                                                                                                                                            | Not reported |
| Katende (2017) (60)     | Uganda                       | inpatients and outpatients                             | Family caregivers<br>Mean age: 33 years                                                                                                                     | 119 | Cancer (Not specified)                                                                                                                  | Parent: 32 (26.9%)<br>Other 1st degree                                                                               | Not reported                                                                                                                                                                    | Not reported |

|                      |              |                                   |                                                                                                                                                                                                     |     |                                                                                                                                                                                                                           |                                                                                                           |                                                                                          |                                                                             |
|----------------------|--------------|-----------------------------------|-----------------------------------------------------------------------------------------------------------------------------------------------------------------------------------------------------|-----|---------------------------------------------------------------------------------------------------------------------------------------------------------------------------------------------------------------------------|-----------------------------------------------------------------------------------------------------------|------------------------------------------------------------------------------------------|-----------------------------------------------------------------------------|
|                      |              |                                   | Age range: 18 to 60 years<br>Sex: Female 80 (67.2%)<br>Employment: Employed: 73 (61.3%)<br>Unemployed: 46 (38.7%)                                                                                   |     |                                                                                                                                                                                                                           | relatives: 49 (41.2%)<br>Extended family: 32 (26.9%)<br>Other: 6 ( 5.0%)                                  |                                                                                          |                                                                             |
| Jones (2012) (28)    | Tanzania     | At their home                     | Primary ICGs of physically dependant stroke survivor<br>Mean age: 47 years<br>Age range: 16 to 73 years<br>Sex: Female 23 (85.19%)<br>Employment: Employed: 17 (63.00%),<br>Unemployed: 10 (37.00%) | 27  | Stroke                                                                                                                                                                                                                    | Children: 14 (51.85%)<br>Spouse:11 (40.74%)<br>Grand children: 2 (7.41%)                                  | At least 6 months                                                                        | Not reported                                                                |
| Gertrude (2019) (21) | Uganda       | admitted in hospital              | ICGs<br>Mean age: Not reported<br>Age range: 18 to ≥55 years<br>Sex: Female 14 (56%)<br>Employment: Employed: 21 (84%%),<br>Unemployed: 4 (16%)                                                     | 25  | STROKE:<br>Ischaemic stroke: 15 (60%)<br>Haemorrhagic stroke: 8 (32%)<br>Stroke (type Missing): 2 (8%)                                                                                                                    | Spouse: 9 (36%)<br>Child/Child in law: 9 (36%)<br>Other: 7 (28%)                                          | 4 months to 1 year: 10 (40%)<br>≥1 year: 15 (60%)<br>(Median duration of care:16 months) | Not reported                                                                |
| Gbiri (2015) (35)    | Nigeria      | Physiotherapy Out-patient Clinics | ICGs assisting with ADL<br>Mean age: 39.2 years<br>Age range: 17 to 74 years<br>Sex: Female 76 (48.4%)<br>Employment: Employed: 105 (66.9%);<br>Unemployed: 52 (33.1%)                              | 157 | Haemorrhagic stroke 61 (38.9%)<br>Ischaemic stroke 96 (61.1%)                                                                                                                                                             | Children: 75 (47.8%)<br>Spouse:45 (28.7%)<br>Children: 21 (13.4%)<br>other significant others: 16 (10.2%) | At least 1 month                                                                         | Below 6 hours: 57 (36.3%)<br>6–12 hours: 82 (60.5%)<br>> 12 hrs: 18 (11.4%) |
| Gawulayo (2021) (46) | South Africa | Not reported                      | Family Caregiver assisting with ADL<br>Mean age: 48 years<br>Age range: 33 to 84 years<br>Sex: Female 5 (62.5%)<br>Employment: Employed: 2 (25%); Unemployed: 6 (75%)                               | 8   | Stroke                                                                                                                                                                                                                    | Tertiary: 1 (12.5%)<br>Secondary: 7 (87.5%)                                                               | At least 6 months                                                                        | Not reported                                                                |
| Esmaili (2018) (63)  | Tanzania     | Not reported                      | Caregiver children with cancer<br>Mean age: Not reported<br>Age range: Not reported<br>Sex: Female 11 (55%)<br>Employment: Not reported                                                             | 20  | Hepatoblastoma (3), Kaposi's sarcoma (3), Osteosarcoma (3), Wilms tumor (3), Chronic myelogenous leukemia (2), Nephroblastoma (2), Chondroid sarcoma (1), Neuroblastoma (1), Non-Hodgkin lymphoma (1), Retinoblastoma (1) | Not reported                                                                                              | Not reported                                                                             | Not reported                                                                |
| Duru (2021) (36)     | Nigeria      | Outpatients                       | Parents of children with Congenital Heart Disease (CHD)<br>Mean age: Not reported<br>Age range: Not reported<br>Sex: Not reported<br>Employment: Not reported                                       | 121 | Acyanotic congenital heart diseases (79.3%), Cyanotic congenital heart (20.7%)                                                                                                                                            | Mothers 84.3%;<br>Guardians 10.7%;<br>Fathers 5.0%                                                        | At least 3 months                                                                        | Not reported                                                                |
| Dhada (2019) (47)    | South Africa | Outpatients                       | ICGs of children<br>Mean age: 38 years<br>Age range: 20 to 67 years<br>Sex: Female 14 (100%)                                                                                                        | 14  | Diabetes Mellitus                                                                                                                                                                                                         | Mother: 9 (64%)<br>Aunt: 3 (22%)<br>Grandmother: 2 (14%)                                                  | • The mean duration of each caregiver's experience of caring for a child                 | Not reported                                                                |

|                         |                             |              |                                                                                                                                                                              |     |                                   |                                                                                                                       |                                                                                                                       |                                                                                                                                                                                                                                                   |
|-------------------------|-----------------------------|--------------|------------------------------------------------------------------------------------------------------------------------------------------------------------------------------|-----|-----------------------------------|-----------------------------------------------------------------------------------------------------------------------|-----------------------------------------------------------------------------------------------------------------------|---------------------------------------------------------------------------------------------------------------------------------------------------------------------------------------------------------------------------------------------------|
|                         |                             |              | Employment: Employed: 2 (14%); Unemployed: 12 (86%)                                                                                                                          |     |                                   |                                                                                                                       | with DM was 3.4 (±2.6) years, with a range between 5 months and 10 years<br>• Diabetes caregiving years (total): 47.4 |                                                                                                                                                                                                                                                   |
| Dawson (2020) (67)      | Ghana                       | Inpatient    | Primary family caregivers<br>Mean age: 40 years<br>Age range: <30 to >50 years<br>Sex: Female 120 (76.9%)<br>Employment: Employed: 130 (83.3%)<br>Unemployed: 26 (16.7%)     | 156 | Lymphoma                          | Auntie/Uncle: 13 (8.3%)<br>Parent: 108 (69.2%)<br>Grandparent: 19 (12.2%)<br>Sibling: 16 (10.3%)                      | at least 1 month                                                                                                      | Mean care hours/ month 52.3<br><br>About 56.8 and 54.0 hours per month are spent by carers in the private sector and self-employed (respectively) assisting patients with daily activities. Average time spent by those unemployed is 53.3 hours. |
| Bessa (2012) (48)       | Togo                        | Not reported | ICGs<br>Mean age: 43 years<br>Age range: 30 to 65 years<br>Sex: Female 14 (82%)<br>Employment: Employed: 7 (41%) Unemployed: 10 (59%)                                        | 17  | Cancer (Not specified)            | Siblings: 5 (29%)<br>Spouse: 4 (24%)<br>Children: 3 (18%)<br>Parent: 2 (12%)<br>Relatives: 2 (12%)<br>Friends: 1 (6%) | 9 (53%) had been caring for a loved one between 4 and 12 months prior to the study                                    |                                                                                                                                                                                                                                                   |
| BeLue (2018) (59)       | Senegal                     | Outpatients  | Family caregiver<br>Mean age: 39.7 years<br>Age range: 20 to 92 years<br>Sex: Female 10 (52.6%)<br>Employment: Not reported                                                  | 19  | Diabetes mellitus                 | Children: 7 (36.8%)<br>Spouse: 4 (21.1%)<br>Sibling: 2 (10.5%)<br>Others: 6 (31.6%)                                   | Not reported                                                                                                          |                                                                                                                                                                                                                                                   |
| Bekui (2023) (64)       | Ghana                       | Not reported | Family caregiver of a child below 12 years<br>Mean age: 39.7 years<br>Age range: 30 to 69 years<br>Sex: Female 3 (20%)<br>Employment: Employed: 12 (80%) Unemployed: 3 (20%) | 15  | Childhood cancers (Not specified) | Not reported                                                                                                          | at least 3 months                                                                                                     |                                                                                                                                                                                                                                                   |
| Akpan-Idiok (2014) (37) | Nigeria                     | Not reported | ICGs<br>Mean age: 35.9 years<br>Age range: <30 to 70 years<br>Sex: Female 132 (62.9%)<br>Employment: Employed 69 (32.9%)<br>Unemployed: 141 (67.1%)                          | 210 | Cancer (Not specified)            | Children: 132 (62.9%)<br>Spouse/partner: 43 (20.5%)<br>Sibling: 21 (10%)<br>Friend: 14 (6.7%)                         | Not reported                                                                                                          |                                                                                                                                                                                                                                                   |
| Adejoh (2021) (9)       | Nigeria, Uganda, & Zimbabwe |              | ICGs<br>Mean age: 37 years<br>Age range: 19 to 75 years<br>Sex: Female 24 (50%)<br>Employment: Not reported                                                                  | 48  | Cancer (Not specified)            | Sibling 18 (37.50%)<br>Son/daughter 15 (31.25%)<br>Spouse: 11 (22.92%)<br>Parent 5 (8.33%)                            | Not reported                                                                                                          |                                                                                                                                                                                                                                                   |
| Abba (2022) (38)        | Nigeria                     | Outpatients  | ICGs<br>Mean age: 28.1 years                                                                                                                                                 | 218 | Stroke                            | Not reported                                                                                                          | 1 – 26 weeks: 204 (93.6%)<br>27 - 52 weeks:                                                                           | Full-time: 139 (63.8%)<br>Part-time: 79 (36.2%)                                                                                                                                                                                                   |

|                         |          |                            |                                                                                                                                                                                             |     |                        |                                                                                                                     |                                                                                                                     |                                                                                                     |
|-------------------------|----------|----------------------------|---------------------------------------------------------------------------------------------------------------------------------------------------------------------------------------------|-----|------------------------|---------------------------------------------------------------------------------------------------------------------|---------------------------------------------------------------------------------------------------------------------|-----------------------------------------------------------------------------------------------------|
|                         |          |                            | Age range: 18 to 57 years<br>Sex: Female 132 (60.6%)<br>Employment: Unemployed 83 (38.1%)<br>Employed 135 (61.9%)                                                                           |     |                        |                                                                                                                     | 12 (5.5%)<br>53 - 78 weeks: 1<br>(0.5%)<br>79 - 104 weeks:<br>1 (0.5%)                                              |                                                                                                     |
| Yousif (2022)<br>(51)   | Sudan    |                            | Parents of children with diabetes<br>Mean age: Not reported<br>Sex: Not reported<br>Employment: Not reported                                                                                | 150 | Diabetes Mellitus      | Fathers and mothers<br>(Proportion not given)                                                                       | Not reported                                                                                                        |                                                                                                     |
| Ogunyemi<br>(2021) (39) | Nigeria  | Not reported               | Primary ICGs<br>Mean age: Not reported<br>Age range: ≤18 to 60 years<br>Sex: Female 223 (57.9%)<br>Employment: Employed: 231 (60%)<br>Unemployed: 154 (40%)                                 | 385 | Cancer (Not specified) | Parent: 133 (34.6%)<br>Sibling: 93 (24.2%)<br>Spouse: 61 (15.8%)<br>Child: 32 (8.3%)<br>Others: 66 (17.1%)          | ≤ 6 months: 125<br>(43.4%)<br>7 - 12 months:<br>123 (42.7%)<br>≥ 13 months: 40<br>(13.9%)<br>Median = 12<br>(±12.6) | 1 - 5 hours: 204 (53.0%)<br>6 - 11 hours: 132 (34.3%)<br>≥ 12 hours: 49 (12.7%)<br>Median =6 (±5.8) |
| Malangwa<br>(2022) (58) | Tanzania | Both in and<br>outpatients | Caregivers with children confirmed with cancer.<br>Mean age: Not reported<br>Age range: 18-60 years<br>Sex: Female 70 (72.9%)<br>Employment: Employed: 44 (45.8%)<br>Unemployed: 52 (54.2%) | 96  | Cancer (Not specified) | Father/Mather: 79<br>(82.3%)<br>Brother/Sister: 8 (8.3%)<br>Aunt/Uncle: 3 (3.1%)<br>Grandmother/father: 6<br>(6.3%) |                                                                                                                     |                                                                                                     |
| Ababacar<br>(2022) (55) | Senegal  |                            | ICGs<br>Mean age: 42.6<br>Age range: 22 to 75 years<br>Sex: Female 32 (54.2%)<br>Employment: Employed: 42 (70%) Unemployed:<br>18 (30%)                                                     | 60  | Stroke                 | Children (50%)<br>Spouses (25%)<br>Siblings (13.33%)<br>Nephews/nieces<br>(11.66%)                                  |                                                                                                                     |                                                                                                     |

## 203 Quality of the included studies

204 Overall, the included articles were of good quality as shown in Table 2. More than three-quarters  
 205 (83%) of these articles met at least four of the five criteria. In two articles (33,55), only two of  
 206 the five criteria were met. The weaknesses of the quantitative articles were predominantly related  
 207 to the failure to report or justify the sampling strategy, sample size and risk of nonresponse bias.  
 208 All the qualitative articles met at least four of the Mixed Methods Appraisal Tool (MMAT)  
 209 criteria except one (25) where three of the five criteria were met.

210 **Table 2. Quality Appraisal of the reviewed articles**

| Author, year                            | S1  | S2  | Quality scores |     |     |     |     |
|-----------------------------------------|-----|-----|----------------|-----|-----|-----|-----|
|                                         |     |     | 1.1            | 1.2 | 1.3 | 1.4 | 1.5 |
| <b>QUALITATIVE STUDIES</b>              |     |     |                |     |     |     |     |
| Walubita (2018) (12)                    | Yes | Yes | 1              | 1   | 1   | 1   | 1   |
| Thomas (2008) (40)                      | Yes | Yes | 1              | 1   | 1   | 0   | 1   |
| Tchokote (2020) (25)                    | Yes | Yes | 1              | 0   | 1   | 1   | 0   |
| Owoo (2022) (54)                        | Yes | Yes | 1              | 1   | 1   | 1   | 1   |
| Owoo (2022) (53)                        | Yes | Yes | 1              | 1   | 0   | 1   | 1   |
| Mthembu (2016) (41)                     | Yes | Yes | 1              | 1   | 1   | 0   | 1   |
| Mlaba (2021) (43)                       | Yes | Yes | 1              | 1   | 1   | 0   | 1   |
| Mlaba (2020) (42)                       | Yes | Yes | 1              | 1   | 1   | 1   | 0   |
| Mensah (2021) (66)                      | Yes | Yes | 1              | 1   | 1   | 1   | 1   |
| Masuku, (2018) (44)                     | Yes | Yes | 1              | 1   | 1   | 1   | 1   |
| Masika (2020) (62)                      | Yes | Yes | 1              | 1   | 1   | 1   | 1   |
| Maree (2018) (11)                       | Yes | Yes | 1              | 1   | 1   | 1   | 1   |
| Khondowe (2007) (68)                    | Yes | Yes | 1              | 1   | 1   | 1   | 1   |
| Ketlogetswe (2022) (45)                 | Yes | Yes | 1              | 1   | 1   | 1   | 0   |
| Gertrude (2019) (21)                    | Yes | Yes | 1              | 1   | 1   | 1   | 1   |
| Gawulayo (2021) (46)                    | Yes | Yes | 1              | 1   | 1   | 1   | 1   |
| Esmaili (2018) (63)                     | Yes | Yes | 1              | 1   | 1   | 1   | 0   |
| Dhada (2019) (47)                       | Yes | Yes | 1              | 1   | 1   | 1   | 1   |
| Bessa (2012) (48)                       | Yes | Yes | 1              | 1   | 1   | 1   | 1   |
| BeLue (2018) (59)                       | Yes | Yes | 1              | 1   | 1   | 0   | 1   |
| Bekui (2023) (64)                       | Yes | Yes | 1              | 1   | 1   | 1   | 1   |
| Adejoh (2021) (9)                       | Yes | Yes | 1              | 1   | 1   | 1   | 1   |
| <b>NRT QUANTITATIVE STUDIES</b>         |     |     |                |     |     |     |     |
|                                         | S1  | S2  | 3.1            | 3.2 | 3.3 | 3.4 | 3.5 |
| Serfontein (2019) (26)                  | Yes | Yes | 1              | 1   | 0   | 1   | 1   |
| Scheffler (2019) (27)                   | Yes | Yes | 1              | 0   | 1   | 1   | 1   |
| <b>QUANTITATIVE DESCRIPTIVE STUDIES</b> |     |     |                |     |     |     |     |
|                                         | S1  | S2  | 4.1            | 4.2 | 4.3 | 4.4 | 4.5 |
| Yusuf (2011) (29)                       | Yes | Yes | 0              | 0   | 1   | 1   | 1   |
| Wassie (2021) (56)                      | Yes | Yes | 1              | 1   | 1   | 1   | 1   |
| Vincent-Onabajo (2018) (30)             | Yes | Yes | 1              | 1   | 1   | 1   | 1   |
| Onyeneho (2021) (31)                    | Yes | Yes | 1              | 1   | 1   | 1   | 1   |



|                              |           |           |            |            |            |            |            |
|------------------------------|-----------|-----------|------------|------------|------------|------------|------------|
| Okeke (2020) (32)            | Yes       | Yes       | 1          | 1          | 1          | 1          | 1          |
| Ohaeri (1999) (33)           | Yes       | Yes       | 0          | 0          | 1          | 0          | 1          |
| Ogunmodede (2019) (34)       | Yes       | Yes       | 1          | 1          | 1          | 1          | 1          |
| Muriuki (2023) (50)          | Yes       | Yes       | 1          | 1          | 1          | 1          | 1          |
| Muliira (2019) (57)          | Yes       | Yes       | 0          | 1          | 1          | 0          | 1          |
| Marima (2019) (49)           | Yes       | Yes       | 1          | 1          | 1          | 1          | 1          |
| Kitoko (2022) (52)           | Yes       | Yes       | 1          | 0          | 1          | 0          | 1          |
| Katende (2017) (60)          | Yes       | Yes       | 1          | 0          | 1          | 1          | 1          |
| Jones (2012) (28)            | Yes       | Yes       | 1          | 0          | 1          | 1          | 1          |
| Gbiri (2015) (35)            | Yes       | Yes       | 0          | 0          | 1          | 1          | 1          |
| Duru (2021) (36)             | Yes       | Yes       | 1          | 1          | 1          | 1          | 1          |
| Dawson (2020) (67)           | Yes       | Yes       | 1          | 1          | 1          | 1          | 1          |
| Akpan-Idiok (2014) (37)      | Yes       | Yes       | 1          | 0          | 1          | 0          | 1          |
| Abba (2022) (38)             | Yes       | Yes       | 0          | 1          | 1          | 1          | 1          |
| Yousif (2022) (51)           | Yes       | Yes       | 1          | 0          | 1          | 1          | 1          |
| Ogunyemi (2021) (39)         | Yes       | Yes       | 1          | 1          | 1          | 1          | 1          |
| Malangwa (2022) (58)         | Yes       | Yes       | 1          | 1          | 1          | 1          | 1          |
| Ababacar (2022) (55)         | Yes       | Yes       | 0          | 0          | 1          | 0          | 1          |
|                              |           |           |            |            |            |            |            |
| <b>MIXED METHODS STUDIES</b> | <b>S1</b> | <b>S2</b> | <b>5.1</b> | <b>5.2</b> | <b>5.3</b> | <b>5.4</b> | <b>5.5</b> |
| Mekonnen (2020) (61)         | Yes       | Yes       | 1          | 1          | 1          | 0          | 1          |

211 *MMAT* Mixed Methods Appraisal Tool [*NRT* Non-randomised Trial, *S1*—Are there clear  
212 research questions? *S2*—Do the collected data allow to address the research questions? 1.1—Is  
213 the qualitative approach appropriate to answer the research question? 1.2—Are the qualitative  
214 data collection methods adequate to address the research question? 1.3—Are the findings  
215 adequately derived from the data? 1.4—Is the interpretation of results sufficiently substantiated  
216 by data? 1.5—Is there coherence between qualitative data sources, collection, analysis and  
217 interpretation? 3.1—Are the participants representative of the target population? 3.2—Are  
218 measurements appropriate regarding both the outcome and exposure/intervention? 3.3—Are  
219 there complete outcome data? 3.4—Are the confounders accounted for in the design and  
220 analysis? 3.5—During the study period, is the intervention/exposure administered as intended?  
221 4.1—Is the sampling strategy relevant to address the research question? 4.2—Is the sample  
222 representative of the target population? 4.3—Are the measurements appropriate? 4.4—Is the risk  
223 of response bias low? 4.5—Is the statistical analysis appropriate to answer the research  
224 question? 5.1—Is there an adequate rationale for using a mixed methods design to address the  
225 research question? 5.2—Are the different components of the study effectively integrated to  
226 answer the research question? 5.3—Are the results adequately brought together into overall  
227 interpretations? 5.4—Are divergences and inconsistencies between quantitative and qualitative  
228 results adequately addressed? 5.5—Do the different components of the study adhere to the  
229 quality criteria of each tradition of the methods involved?], *Y* Criteria satisfied, *N* Criteria not  
230 satisfied. 1—Criteria satisfied, 0—Criteria not satisfied

231

232

## 233 **Participants characteristics**

234 In this review, two (4.3%) of the 47 articles had samples with paid caregivers forming part of the  
235 population, although in small proportions. That is, they made up 8.8% (7/80) of the sample in  
236 one article (27) and 1% (1/100) in the second article (34). Similarly, caregivers whose care  
237 recipients had died formed part of the sample in two articles (42,43). For each study, these  
238 caregivers accounted for 15% of the respective samples. There was no study with a comparison  
239 group. Also, ten articles (29,30,32,34,38,49,52,56–58) (41.7% of the quantitative articles) noted  
240 that they excluded ICGs who had any of the outcomes of interest prior to assuming the caregiving  
241 role.

242 The majority of caregivers were either parents, siblings, children, spouses or other relatives of  
243 the patient and their ages ranged from ten (31) to ninety-two years (59). The proportion of non-  
244 familial caregivers was less than 10% in each of the seven (14.9%) articles  
245 (27,32,34,37,45,48,60) where they were part of the sampled populations. In 19% (9/47) of the  
246 articles (12,36,47,51,58,61–64), the participants were caregivers of children with chronic  
247 diseases. More than half of the articles (53.2%, 25/47) focused on caregivers of people with  
248 cancers (9,11,12,29,31,33,37,39,42,43,45,48,53,54,56–58,60–67). The rest of the articles  
249 studied caregivers of people with cardiovascular diseases (21,25–  
250 28,30,32,35,36,38,40,44,46,49,52,55,68) (36.2%, 17/47) and diabetes mellitus (34,47,51,59)  
251 (8.5%, 4/47). There was no study with caregivers of people with chronic obstructive pulmonary  
252 disease. Generally, there were more female participants than male participants. However, in just  
253 five (10.6%) of these papers (29,35,56,64,66), the proportion of females did not reach at least  
254 half of the total participants. The characteristics of the included studies and participants are  
255 summarised in

256 **Table 1.**

## 257 **Activities performed by ICGs**

258 The roles performed by caregivers were described in two-fifths (20/47) of the included articles.  
259 With the exception of one (45), these articles listed the various things caregivers did. In this  
260 article, the authors simply stated that performed activities of daily living were demanding and  
261 exhausting but did not specify what tasks they were.

262 In this review, we have grouped informal caregivers' activities into three activities.

263 i. Basic activities of daily living

264 These are personal care tasks that are important for one's everyday living. The ICGs played a  
265 critical role in supporting care recipients with personal care activities like bathing and dressing  
266 (9,11,21,25,35,40,41,48,54,66,68), toileting (21,48) and feeding (21,25,64). They also assisted  
267 with functional mobility activities that support the patient to move in and out of bed,  
268 repositioning, ambulating and moving up/down the stairs (21,25,35,40,48).

269 ii. Instrumental activities of daily living

270 These activities were quite diverse and included caring for the patient's children (40), shopping  
271 for the patient (11,68) and doing domestic tasks (house chores) like room cleaning, making  
272 meals, laundry and washing utensils (9,11,25,36,40,46,48,54,59,66). The caregivers were  
273 actively involved in the health management of their sick loved ones by managing medical  
274 appointments and transporting the patient to hospital (9,11,21,25,36,42,46,47,53,59,62,64,68),  
275 communicating with health workers on the patient's behalf (9), paying medical expenses  
276 (9,21,35,36,42,47,48,59,62,63), providing company and psychological support to patient  
277 (9,21,59,62) and monitoring the patient's symptoms (11,47,66).

278 iii. Medical activities

279 The ICGs performed activities that would ideally require a certain level of medical training,  
280 experience or knowledge. Eight articles (9,11,21,25,40,41,59,66) highlighted specific medical  
281 procedures that were done by the ICGs. These included changing colostomy bags, wound  
282 dressing, helping patient use oxygen breathing apparatus and administering both oral and  
283 injectable medications for the patient. Despite performing these tasks, the ICGs acknowledged  
284 their lack of knowledge and skills. This was clearly articulated by one caregiver: "*To be honest*  
285 *I cannot say I have been doing a great job of caring for my father....it is just a 'trial and error'*  
286 *situation. It feels like I am not doing enough. Somehow, I feel like giving up...*"(45).

287 **Reasons/motivation to provide care**

288 The reasons for taking up caregiving roles were recorded in six (12.8%) papers  
289 (11,21,25,45,48,64), all of which were qualitative studies. From their submissions, it was clear  
290 that the decision to provide informal care depended on two things; how related or connected the  
291 ICG was to the patient and the ICG's level of responsibility (social obligation) over the patient.

292 i. Relationship between the caregiver and the patient

293 Regarding the relationship (or connectedness) to the patient, ICGs narrated how they provided  
 294 care because of the love that existed in their relationship either as family members, neighbours  
 295 or friends (21,48). Because of this bond (and feeling of belonging), they willingly volunteered  
 296 and often considered themselves the most suitable persons to care for their loved ones. The  
 297 closeness of the relationship between the caregiver and recipient is a strong motivator for  
 298 becoming a caregiver. This view was echoed by a Togolese caregiver who was quoted saying,  
 299 *“The problem is that nobody can take care of my mother as I am doing it. If something does not*  
 300 *belong to you, you treat it differently.”* Another participant in the same study added, *“I see myself*  
 301 *in a better position to do the care work because I know her very well.”* (48).

302 ii. Level of responsibility the caregiver has over the patient.

303 Quite relatedly, the ICGs also viewed their decision to care as a form of responsibility or a social  
 304 obligation (11,25,45,48,64). They naturally took on the role and were as committed in the work  
 305 as they would in any other professional job. They considered caring as a duty they were obliged  
 306 to perform against all odds for those they were socially expected to support. One mother  
 307 explained how she had to take her older child (with cancer) to the hospital despite her own poor  
 308 health: *“I remember there was a time I sat in a chair by the bedside throughout the night and my*  
 309 *legs got swollen...it was not easy, but I passed through all that. When I gave birth on Thursday,*  
 310 *the following Tuesday I had to bring my sick son to the hospital for review...I had to do it.”* (64)

### 311 **Impact of caregiving on the caregiver**

312 All studies had an aspect of the impact (health or economic) caregiving had on the carers. In this  
 313 section, results on how the impact was measured, positive impact of caregiving, economic impact  
 314 of caregiving and health impact of caregiving was provided. These are also summarised in Table  
 315 3

316 **Table 3. Table showing the results identified in the included articles**

| Results                                    | Sub-heading                                                | Studies                                             |
|--------------------------------------------|------------------------------------------------------------|-----------------------------------------------------|
| Activities done by caregivers (20 studies) | Basic activities of daily living                           | (9,11,21,25,35,40,41,48,54,64,66,68)                |
|                                            | Instrumental activities of daily living                    | (9,11,21,25,35,36,40–42,46–48,53,54,59,62–64,66,68) |
| Motivation to become an ICG                | Relationship between the caregiver and the patient         | (21,48)                                             |
|                                            | Level of responsibility the caregiver has over the patient | (11,25,45,48,64)                                    |
|                                            | Positive impact of caregiving on ICGs                      | (41,59)                                             |
|                                            | Economic impact of caregiving                              | 1. Cost of caregiving<br>(9,25,36,40,48,55,63,67)   |

|                      |                             |                                                                                                                                                                                                                                   |
|----------------------|-----------------------------|-----------------------------------------------------------------------------------------------------------------------------------------------------------------------------------------------------------------------------------|
| Impact of caregiving |                             | <ol style="list-style-type: none"> <li>2. Work-related effects of caregiving (9,11,12,21,25,26,40–42,44–48,50,55,59,62,64,66,68)</li> <li>3. Financial challenges (11,26,27,31,33,35–37,39,40,42,45–47,50,62–64,66–68)</li> </ol> |
|                      | Health impact of caregiving | <ol style="list-style-type: none"> <li>1. Impact on the physical health of ICG (21,25,30,35,38,40,43,45,48,50,54,64)</li> <li>2. Impact on the mental health of ICG (21,25,28,29,32,34,40,43–45,47–49,51,52,55–62)</li> </ol>     |

317

## 318 **Measurement of the impact of caregiving**

319 From the findings, about half of the articles (22/47) used standardised tools/instruments to  
 320 determine the impact of caregiving. It was only the qualitative papers and one quantitative paper  
 321 (36) where no standardised instrument was used in measuring the impact of caregiving. The tools  
 322 (in their original or modified form) used include, the Zarit Burden Interview (ZBI) questionnaire  
 323 (29,31,32,34,35,37,39,52,55,67), the Hospital Anxiety and Depression Scale (HADS)  
 324 (28,52,57,60), Caregiver strain index (CSI) (26,27,35,50), Nordic Musculoskeletal  
 325 Questionnaire (NMQ) (30,38), General health questionnaire (GHQ) (29,33,34), Patient Health  
 326 Questionnaire-9 (PHQ-9) for Depression (56) Caregiver Reaction Assessment scale (CRA) (57),  
 327 Beck's depression inventory (BDI) scale (61), Shona Symptoms Questionnaire (SSQ) (49), The  
 328 modified Rankin scale (mRS) (52), Depression, Anxiety, Stress Scale-21 Items (DASS-21) (51)  
 329 EUROHIS QoL (67), Modified version of the Frankfurter Befindlichkeit Skala (FBS) (33) and  
 330 Hopkins Symptom Checklist (HSCL-25) tool (58). Two studies (36,67) used cost of illness  
 331 approaches to estimate the direct and indirect costs incurred by the caregivers who supported  
 332 people with chronic diseases.

## 333 **Positive impact of caregiving**

334 Although the focus of most articles was on the negative impact of caregiving, two articles (41,59)  
 335 in particular had caregivers who described how rewarding the activity was to them. They  
 336 commented on how the situation strengthened the bond with the person being cared for, thus  
 337 enabling them to develop the dedication and emotional strength to continue caring. Furthermore,  
 338 the practice of caring became a strong motivation for improvement of their own health (59).  
 339 Whenever they saw how their loved ones suffered, they felt energized to do whatever was  
 340 necessary to avoid getting the same disease. They became motivated to adopt a healthier lifestyle  
 341 that included having regular medical check-ups, doing more exercises and taking healthier meals.

342 Because of their involvement in the day-to-day management of the care recipients, they acquired  
343 skills and knowledge to protect themselves from acquiring the disease and to fulfil the care needs  
344 better. For example, one caregiver who was always there whenever the doctor came to treat his  
345 wife stated that, “*my experience helps a lot to avoid diabetes in my own life. What the doctor*  
346 *says to my wife, I also apply to my own life because that is good for everyone, not just the diabetic*  
347 *patients.*” (59)

## 348 **Economic impact of caregiving**

349 There were three key findings under economic impact, and these were the cost of caregiving, the  
350 work-related consequences of caregiving and the subsequent financial challenges arising from  
351 caregiving.

### 352 i. Direct costs of caregiving

353 Surprisingly, only 4 articles (36,48,55,67) provided information on the cost of caregiving on the  
354 caregiver. Of these, only 2 articles gave an estimate of the overall cost of providing informal  
355 care. According to the studies by Dawson *et al* (67) and Duru *et al* (36), the monthly mean cost  
356 of caregiving for each patient was US\$440.32 (SD: US\$205.75) and US\$ 20.36 ± US\$ 27.82,  
357 with direct costs accounting for 97% and 81% of the total costs respectively. The only  
358 information on the costs of care that Bessa *et al* provided was the average monthly money (US\$  
359 66 monthly (range = US\$ 21 – US\$ 213)) spent by ICGs on their loved ones with cancer (48).

360 Two articles (36,55) discussed the monetary value of the productivity loss incurred by ICGs  
361 while providing care. The mean productivity loss incurred by caregivers in Duru *et al*'s study  
362 (36) was \$53.42 ± \$88.12 (range US\$1.38 to US \$ 575.00) while those in the study by Ababacar  
363 *et al* (55) experienced a financial loss of 206.92 USD (SD: 583.16 USD) (range: 0 to 3103.44  
364 USD).

### 365 ii. Social cost of caregiving

366 Of note, are the 4/47 articles (9,25,40,63) that commented on the social cost associated with  
367 informal caregiving. Opportunity cost refers to the cost of foregoing other rewarding activities  
368 in order to support a sick loved one. As one ICG put it, caregiving “*restricts our lives*” (40)  
369 giving them little room for engagement in other activities. A female ICG in Cameroon  
370 commented on the cost involved in letting go of her previously planned activities. She stated,  
371 “*Since my mother is in this state, [...] I am obliged to suspend my participation in the church*

372 *every morning as I did before because it is no longer possible! I had to review all my activities*  
373 *because I had to find time for my mother! It's painful but I do it!" (25).*

374 While some caregivers had to let go of their regular leisure activities (25), others especially the  
375 students ended up missing attending classes at school (40).

376 iii. Work-related consequences of caregiving

377 In 21 (44.7%) studies, there is a clear demonstration of how caregiving affected all aspects of  
378 one's work life (regular source of income). Since caring often required one's physical presence,  
379 the caregivers not only used up all the available work leave (including taking leave without pay)  
380 but they were also frequently absent (without permission) from work. This resulted into being  
381 queried, warned, sanctioned and in other cases dismissed (9,11,48,64,66). In the study by  
382 Ababacar et al. (2022) (55) the caregivers were off work for an average of 23.86 days (SD 64.53  
383 days) per year with extremes ranging from 0 to 365 days.

384 The participants admitted that they struggled to maintain a balance between work and caregiving  
385 roles (9,11,21,41,48,59,66,68). This made them less efficient (productive) at work and unable to  
386 meet several deadlines because they frequently arrived late for work, spent less time doing work  
387 and struggled to concentrate while at work (12,25,42,48,66). This situation was well explained  
388 by the caregiver who said, "*There was a piece job that I had in Durban, it was affected because*  
389 *I had to be here in Pietermaritzburg to take care of her [my mother]. I couldn't stay [at work]*  
390 *for the week and come back on the weekend or month end, I had to keep coming back here [to*  
391 *check on my mother]."* (42)

392 As such, they had to make work-related adjustments that would allow them to attend to their sick  
393 loved ones too. Part of the adjustments included getting a flexible work schedule that allowed  
394 them to work either at night or from home (26,44,50,55) and changing to temporary self-  
395 employment or to jobs that are flexible and closer to the patient's home (42,46,55). In cases  
396 where the caregivers could not maintain both work and caregiving roles, they either voluntarily  
397 resigned or were dismissed from work (9,11,12,21,40–42,45–48,55,62,64,66).

398 iv. Financial challenges arising from caregiving.

399 There were 21 (44.7%) articles in which caregivers reported experiencing financial challenges.  
400 First, they stated that they lost money and their sources of income through covering high medical  
401 expenses and loss of jobs (31,33,36,42,45,63,64). Their response to such challenges included  
402 taking loans to get money to care for the patient (33,63,64,66,67), seeking additional financial

403 support from relatives and institutions like churches (62,67), sale of family properties (62,64,66)  
404 and requesting for premature discharge from the hospitals (63).

405 In cases where resources to cover the expenses were inadequate, the ICGs compromised their  
406 standard of living, forewent paying house rent, paying their children's school fees as well as  
407 buying food and clothes in order to meet their patient's care needs (9,63). As a result, some were  
408 reportedly thrown out of their house due to non-paid rent.

409 Overall, caregivers felt that caring was financially burdensome causing them to be in a much less  
410 satisfactory financial status than before taking up the role  
411 (11,26,27,35,37,39,40,42,46,47,50,66,68). They described their financial situation as being  
412 unstable, strenuous and hard, and they often became anxious whenever they thought about where  
413 to get more money to continue with their role (35,46,47). Quantitatively, the prevalence of  
414 caregivers experiencing financial strain ranged from 37.9% to 100% (26,27,37,50).

### 415 **Health Impact of caregiving**

416 Caregiving affected the physical health and mental health of the carers as stated below.

#### 417 i. Physical health consequences of caregiving

418 This was found in twelve articles (21,25,30,35,38,40,43,45,48,50,54,64). The development of  
419 new medical conditions and or worsening of existing health conditions among the ICGs affected  
420 their physical health and reduced their ability to adequately care (35,64). Some attributed this to  
421 lowering of the body's immunity (40) that occurred while providing care. They stated that they  
422 developed new medical conditions such as hypertension, headache, body pains and swelling of  
423 the feet during the period they provided care to the patient (21,45,64). One caregiver even  
424 narrated a life-threatening incident that necessitated hospitalization "*...after collapsing while*  
425 *fetching water for the sick son*" (64). There were also reports of the worsening of the caregivers'  
426 own health condition (21,30,38,45,48,54,64). The articles show how those with musculoskeletal  
427 complications such as pain in upper and lower back, pain in different joints (shoulder, wrist, hips,  
428 buttocks, knees, ankle and elbow joint), and pain in the thighs, neck and feet complained of  
429 deteriorating health. This was well articulated by a caregiver whose waist problem worsened  
430 while caring for her husband. She stated; "*Caring for my husband is not easy; I have a waist*  
431 *problem, and I find myself always very tired. The waist problem was there but was not as serious*  
432 *as it has become now, all because of the role I currently play*" (54).



433 The caregivers in 10 studies experienced significant lifestyle changes during their work. They  
434 felt that their sleep was disturbed because of actual/anticipated care demands, and severity of the  
435 condition of the person they cared for (64). They experienced disruption from sleep, feeling of  
436 lack of enough sleep, feeling like they are deprived of sleep as well as short episodes of sleep  
437 (25,43,45,50,54,64). Another way caregiving affected their lifestyle was through change in  
438 eating habits. This involved either changing the meal time in order to incorporate the caregiving  
439 demands/activities, eating the patient's left over foods or missing the meals due to the lack of  
440 money/ time (54,64). A male carer commented on his changed lifestyle by saying, "*It [life] has*  
441 *changed because I hardly sleep now, I just think that I can't sleep I have to constantly check on*  
442 *him.*" (43)

443 ii. Mental health consequences of caregiving

444 The act of caregiving had a profound effect on the mental wellbeing of care providers as stated  
445 in more than half (23) of the articles (21,25,28,29,32,34,40,43–45,47–49,51,52,55–62).

446 Although most of these articles described the different types of mental health challenges, five  
447 (29,34,49,55,58) did not specify as they only used the terms "psychological" and "psychiatric"  
448 challenges. Using GHQ (29,34), SSQ (49), HSCL-25 (58) and ZBI (29,34,55) tools, the reported  
449 prevalence of psychological/psychiatric challenges among caregivers ranged from 35% to  
450 66.7%.

451 The caregivers experienced mild to severe forms of depression as was assessed using HADS  
452 (28,52,57,60), ZBI (32), PHQ-9 (56), BDI (61) and DASS-21 (51) tools. From these eight  
453 quantitative studies, the prevalence of depression ranged from 26% to 72.4%. In addition, there  
454 were two qualitative studies with ICGs who reported feeling depressed because of the caregiving  
455 work (25,40). Some got to an extent of being treated for depression as explained by this South  
456 African ICG: "... *I also get sick often. I have continuous lung infections from stress. I'm on*  
457 *antidepressants as well.*"

458 Fear, stress and anxiety is another mental health related challenge that caregivers in 9 studies  
459 (28,45,47,51,52,57,59,60,62) reportedly experienced. There was no quantitative paper in which  
460 fear or stress was investigated. Instead, five quantitative papers employing HADS (28,52,57,60)  
461 and DASS-21 (51) tools found that the prevalence of anxiety among ICGs ranged from 21.6%  
462 to 45%. Sometimes, the ICGs thought about the likelihood of acquiring the same illness their  
463 loved ones have or death of those they care-for. Such thoughts caused fear, stress and anxiety  
464 among the ICGs (45,59). This challenge was most felt in the initial stages of caring for the

465 patient, when there was a lot of work to be done and when the activities were complex (47).  
466 While one caregiver hinted at how hard some caregiving activities can sometimes be by saying,  
467 *“the hardship is just injecting the child part, it’s not something that’s easy—it’s not easy –*  
468 *because sometimes you find that the child does not want to be injected...when her sugars are*  
469 *high and you try to inject her – she says ‘you’re injecting me a lot’.”(47)*

470 Another expressed the fear that comes with such activities: *“... The family members you stay*  
471 *with do want to assist with injecting the child but they are scared – so sometimes you’re the only*  
472 *one who’s taking care of the child.” (47)*

473 Five quantitative articles (28,51,52,57,60) explored the prevalence of anxiety among caregivers  
474 and found it to be in the range of 21.6% to 45%.

475 Caregiving was also described as an emotionally challenging activity by participants in four  
476 studies (25,44,45,48). They used phrases such as being morally sick, emotionally painful,  
477 heartbreaking, emotionally touched, burdens me, disturbed and hopelessness to show their  
478 reaction to caring for the sick or the diagnosis given. The extent of suffering that caregivers  
479 observed their loved ones go through was enough to create feelings of preferring to *“isolate*  
480 *[oneself] to cry”* and develop thoughts of *“not ... living anymore”* (44,48). Caregivers confessed  
481 that such reactions also followed the sudden announcement (by the medical team) of the type  
482 disease their loved one was suffering from (25). One participant whose husband had been  
483 diagnosed with cancer recalled such a moment: *“It was painful, wena [‘you’ – exclamation]. You*  
484 *... you know that person is a breadwinner and everyone in his family is looking up to him. He is*  
485 *supporting everyone. Then it was painful, but I think that I am recovering now.” (44)*

486

## 487 **Discussion**

488 In this review, we found a total of 47 qualitative and quantitative studies from across the sub-  
489 Saharan African region that were published over a period of more than two decades.

### 490 **Reasons of becoming an ICG**

491 These studies show that a relationship that is strengthened by love and the sense/feeling of  
492 responsibility over an individual appear to be the most important factors in the decision to

493 provide care. This finding is consistent with those in other reviews with studies from across the  
494 world (17,69). In our review, children as young as ten years of age also participated in providing  
495 care to people with chronic diseases. This can be explained by how responsibilities/activities are  
496 shared or delegated in many African multi-generational homes (29,70). Often, children are  
497 assigned the task of providing care for unwell or elderly relatives while adults participate in  
498 income generating activities (29,70). Once assigned the tasks, the children take them as their  
499 responsibility. The finding from this and other reviews (17,69) may mean that the reasons for  
500 becoming caregivers may not be very different across the world even with varying cultures and  
501 traditions.

## 502 **Activities performed by ICGs**

503 The caregivers, majority of whom were female and were related to the patient, performed a wide  
504 range of activities during their caregiving role. Perhaps the most striking finding is that  
505 caregivers did not end at performing the common/regular tasks like support with feeding and  
506 with personal care needs, but they did complex activities including changing colostomy bags and  
507 administering injectable medication which normally require medical skills/training to do well.  
508 This rather interesting finding points to shortage of health workers in most settings in SSA. In  
509 most cases, the ICGs end up performing these tasks when health professional cannot be accessed  
510 (71,72). The implication of such findings is the possibility of ICGs making numerous mistakes  
511 while conducting procedures they were not trained to perform and unknowingly endangering  
512 themselves and/or those under their care. A recent review conducted in one of the SSA countries  
513 had findings similar to ours (16). In their study, the caregivers were mainly females, relatives of  
514 the patient and performed most activities as described in our work. The only noticeable  
515 difference is that there was no mention of the activities, that we have described as complex. This  
516 is possibly because their study either considered diseases (such as HIV) that are rarely  
517 complicated by events like surgery which may require changing colostomy bags and wound  
518 dressing or the diseases had not yet gotten to a level that required interventions like use of oxygen  
519 therapy or administration of injectable medications.

## 520 **Impact of caregiving on the ICGs**

521 To measure the impact of caregiving, almost all quantitative studies used a standardised  
522 instrument/tool. As shown in the results, a total of 14 different tools were used in the 22 studies  
523 to assess the burden of depression, anxiety, stress and financial strain. Even in the studies where  
524 the same tool was used, the results were presented differently. For example, in the studies that

525 used Zarit burden Interview (ZBI), two (29,32) reported the overall mean ZBI scores while the  
526 rest provided mean scores of each category of burden. This lack of uniformity in the use of  
527 measures and presentation of results make it difficult to compare different studies' results. In this  
528 review, ZBI tool was the most used instrument for measuring the impact of caregiving. It was  
529 used in 10 out of the 22 articles assessing the health or economic impact using an instrument.  
530 This accords with earlier observations from another review which found that ZBI was the most  
531 frequently used tool in measuring the burden of caregivers (73).

532 As discussed in the next three paragraphs, caregiving had both positive and negative effects on  
533 the ICGs. As expected, there were more articles focussed on the negative than positive impact  
534 of caregiving.

535 The rewards experienced by informal caregivers in this review can be explained by the post-  
536 traumatic growth (PTG) theory which suggests that people facing traumatic or challenging events  
537 may experience some positive outcomes from their experience (74). Caring for people, some of  
538 whom are at an advanced stage of a chronic disease can be stressful and traumatic due to the  
539 highly demanding nature of the caregiving tasks. Such situations often prompt ICGs to do self-  
540 reflection leading to the discovery of new and positive insights as well as renewed purpose for  
541 living under the current conditions. A number of recent studies have used this theory to  
542 demonstrate how caregivers' challenging experiences resulted in positive outcomes like renewed  
543 personal strength to continue in their caring role, strengthening of the relationship with care  
544 recipients/family members and taking better care of their own health because they better  
545 appreciate life (75–77).

546 As with other reviews (15,16) conducted in SSA, caregivers with a regular source of income  
547 faced work-related challenges such as absenteeism, dismissal from work and low productivity  
548 as already listed in the results section. Caregivers' involvement in extensive physical work like  
549 assisting patient with mobility-related activities may result into injuries and exhaustion.  
550 Depending on the patient's care needs and severity of the disease, the caregivers may spend a lot  
551 of time with the patient. Under such circumstances, the caregivers will either fail to go to work  
552 or arrive late at work leading to reduced productivity and conflicts at work. The exhaustive nature  
553 and emotional burden that comes with caring for loved ones also reduces one's level of  
554 concentration and performance while at work. In the end, caregivers are often dismissed or forced  
555 to resign from their work. At times, they sought employment in places with work that suited their  
556 caregiving responsibilities such as self-employment, temporary employment or jobs with flexible  
557 working hours (78). It is also worth noting that a disrupted career/job has the potential of causing

558 significant financial strain on the career, hinder career progression and affect retirement  
559 planning. These are likely to persist even after they are no longer providing care.

560 As would be expected, informal caregivers experienced both physical health and mental health  
561 challenges during their work. Several reviews have had similar findings published (14–17). This  
562 is consistent with allostatic load theory, in which McEwen and Stellar observed that although  
563 stressors usually resulted in a normal physiological response as a body's protective mechanism,  
564 exposure to high and sustained stress such as that experienced by informal caregivers caused an  
565 abnormal response that resulted in cumulative wear and tear of the body (79). The allostatic load  
566 experienced by caregivers arises from exhaustive physical activities they do, emotional  
567 challenges caused by the patient's condition and logistical stressors like financial strain. Part of  
568 the abnormal response includes change in the production and levels of hormones like cortisol  
569 and adrenaline which could lead to cardiovascular diseases, weakened immune system,  
570 inflammation, metabolic changes (affecting an individual's appetite) and mental health diseases.

## 571 **Limitations of the review**

572 This review had some limitations. First, the second reviewer could only screen a proportion of  
573 studies during the title and abstract screening stage and during the full text screening. Also, a  
574 single author extracted the data from the included studies with the second reviewer checking the  
575 accuracy of the data. A study showed that a complete dual review significantly minimised  
576 random errors compared to either single review or limited dual review (80).

577 Secondly, we were unable to get all the full-texts of the conference abstracts that were included  
578 in this review. While the contacts for some authors could not be retrieved, the majority of those  
579 contacted either did not respond or did not have the full-texts for their abstracts available. It is  
580 therefore possible that some important articles could have been missed.

581 Furthermore, some studies did not provide adequate information as some data was either unclear  
582 or not reported. This includes information on sex, age and well as the impact of caregiving. This  
583 limited our ability to extract all the relevant data required to comprehensively analyse the data.

584 Lastly, most quantitative studies used a cross-sectional study design making it difficult to assess  
585 the cause-and-effect relationship, and to understand the changes that occur over time. However,  
586 almost half of these articles excluded participants with outcomes of interest prior to starting  
587 caregiving.

## 588 **Strengths of the review**

589 Part of the strength of this review is in the fact that we used a very broad search strategy to  
590 extensively search a good number of relevant databases. We also included non-English articles.  
591 These enabled us to capture as many relevant articles and information as possible. The use of a  
592 second reviewer improved the reliability and quality of the findings through reducing the errors  
593 and biases that could have risen if only one reviewer was involved in the review process.

594

## 595 **Conclusions**

596 The ICGs occupy an essential place in the health care system of most SSA countries and they  
597 perform a broad range of tasks, some of which they are ill-prepared or untrained to do. The  
598 growing demand for ICGs created by the increasing chronic diseases in the African continent  
599 means that health care systems would function better if they are adjusted to prepare ICGs for the  
600 caregiving roles, and to support the physical and mental wellbeing of ICGs. Future research  
601 should investigate the most suitable tools/instruments for assessing the impact of care on the  
602 caregiver.

603

## 604 **References**

- 605 1. Chang AY, Cowling K, Micah AE, Chapin A, Chen CS, Ikilezi G, et al. Past, present,  
606 and future of global health financing: a review of development assistance, government,  
607 out-of-pocket, and other private spending on health for 195 countries, 1995–2050. The  
608 Lancet [Internet]. 2019 Jun;393(10187):2233–60. Available from:  
609 <https://linkinghub.elsevier.com/retrieve/pii/S0140673619308414>
- 610 2. Asante A, Wasike WSK, Ataguba JE. Health Financing in Sub-Saharan Africa: From  
611 Analytical Frameworks to Empirical Evaluation. Appl Health Econ Health Policy  
612 [Internet]. 2020 Dec 4;18(6):743–6. Available from:  
613 <http://link.springer.com/10.1007/s40258-020-00618-0>

- 614 3. Ly MS, Bassoum O, Faye A. Universal health insurance in Africa: a narrative review of  
615 the literature on institutional models. *BMJ Glob Health* [Internet]. 2022 Apr  
616 28;7(4):e008219. Available from: [https://gh.bmj.com/lookup/doi/10.1136/bmjgh-2021-](https://gh.bmj.com/lookup/doi/10.1136/bmjgh-2021-008219)  
617 008219
- 618 4. Barasa E, Kazungu J, Nguhiu P, Ravishankar N. Examining the level and inequality in  
619 health insurance coverage in 36 sub-Saharan African countries. *BMJ Glob Health*  
620 [Internet]. 2021 Apr 26;6(4):e004712. Available from:  
621 <https://gh.bmj.com/lookup/doi/10.1136/bmjgh-2020-004712>
- 622 5. Lebina L, Kawonga M, Oni T, Kim HY, Alaba OA. The cost and cost implications of  
623 implementing the integrated chronic disease management model in South Africa. *PLoS*  
624 *One*. 2020 Jun 26;15(6):e0235429.
- 625 6. WHO. Noncommunicable diseases [Internet]. 2018 [cited 2020 Aug 31]. Available  
626 from: <https://www.who.int/news-room/fact-sheets/detail/noncommunicable-diseases>
- 627 7. Bigna JJ, Noubiap JJ. The rising burden of non-communicable diseases in sub-Saharan  
628 Africa. *Lancet Glob Health* [Internet]. 2019 Oct;7(10):e1295–6. Available from:  
629 <https://linkinghub.elsevier.com/retrieve/pii/S2214109X19303705>
- 630 8. Roth DL, Fredman L, Haley WE. Informal Caregiving and Its Impact on Health: A  
631 Reappraisal From Population-Based Studies. *Gerontologist* [Internet]. 2015 Apr 1 [cited  
632 2020 Jul 24];55(2):309–19. Available from:  
633 <https://academic.oup.com/gerontologist/article/55/2/309/656865>
- 634 9. Adejoh SO, Boele F, Akeju D, Dandadzi A, Nabirye E, Namisango E, et al. The role,  
635 impact, and support of informal caregivers in the delivery of palliative care for patients  
636 with advanced cancer: A multi-country qualitative study. *Palliat Med* [Internet]. 2021

- 637 Mar 23;35(3):552–62. Available from:  
638 <http://journals.sagepub.com/doi/10.1177/0269216320974925>
- 639 10. Gambe RG, Clark J, Meddick-dyson SA, Ukoha-Kalu BO, Nyaaba GN, Murtagh FEM.  
640 The roles and experiences of informal carers providing care to people with advanced  
641 cancer in Africa — A systematic review and critical interpretive analysis. *PLOS Glob*  
642 *Public Health* [Internet]. 2023;3(4):1–18. Available from:  
643 <http://dx.doi.org/10.1371/journal.pgph.0001785>
- 644 11. Maree JE, Moshima D, Ngubeni M, Zondi L. On being a caregiver: The experiences of  
645 South African family caregivers caring for cancer patients. *Eur J Cancer Care (Engl)*  
646 [Internet]. 2018 Mar;27(2):e12801. Available from:  
647 <https://onlinelibrary.wiley.com/doi/10.1111/ecc.12801>
- 648 12. Walubita M, Sikateyo B, Zulu JM. Challenges for health care providers, parents and  
649 patients who face a child hood cancer diagnosis in Zambia. *BMC Health Serv Res*. 2018  
650 Dec 2;18(1):314.
- 651 13. Njororai F, Njororai WWS. Older adult caregivers to people with HIV/AIDS in Sub-  
652 Saharan Africa: A review of literature and policy implications for change. *Int J Health*  
653 *Promot Educ*. 2013;51(5):248–66.
- 654 14. Gysels M, Pell C, Straus L, Pool R. End of life care in sub-Saharan Africa: A systematic  
655 review of the qualitative literature. *BMC Palliat Care*. 2011;10.
- 656 15. Addo R, Agyemang SA, Tozan Y, Nonvignon J. Economic burden of caregiving for  
657 persons with severe mental illness in sub-Saharan Africa: A systematic review. Bowen  
658 M, editor. *PLoS One* [Internet]. 2018 Aug 9;13(8):e0199830. Available from:  
659 <https://dx.plos.org/10.1371/journal.pone.0199830>



- 660 16. Komuhangi A, Jenkins C, Nakaggwa F, Agaba P, Githinji F, Ewuzie A, et al. The needs,  
661 challenges, and burden experienced by informal caregivers in Uganda: a scoping review.  
662 Discover Social Science and Health [Internet]. 2022 Jan 10 [cited 2022 Aug 22];2(1):1–  
663 28. Available from: <https://link.springer.com/article/10.1007/s44155-022-00004-2>
- 664 17. Hogan U, Bingley A, Morbey H, Walshe C. The experience of informal caregivers in  
665 providing patient care in hospitals in low- and middle-income countries: A qualitative  
666 meta-synthesis [Internet]. Vol. 27, Journal of Health Services Research and Policy.  
667 SAGE PublicationsSage UK: London, England; 2022 [cited 2022 Jul 30]. p. 321–9.  
668 Available from: <http://journals.sagepub.com/doi/10.1177/13558196221101968>
- 669 18. Page MJ, McKenzie JE, Bossuyt PM, Boutron I, Hoffmann TC, Mulrow CD, et al. The  
670 PRISMA 2020 statement: an updated guideline for reporting systematic reviews. BMJ  
671 [Internet]. 2021 Mar 29;n71. Available from:  
672 <https://www.bmj.com/lookup/doi/10.1136/bmj.n71>
- 673 19. Fong JH. Disability incidence and functional decline among older adults with major  
674 chronic diseases. BMC Geriatr [Internet]. 2019 Dec 21;19(1):323. Available from:  
675 <https://bmcgeriatr.biomedcentral.com/articles/10.1186/s12877-019-1348-z>
- 676 20. Sadigh M, Nawagi F, Sadigh M. The Economic and Social Impact of Informal  
677 Caregivers at Mulago National Referral Hospital ,. Ann Glob Health [Internet].  
678 2016;82(5):866–74. Available from: <http://dx.doi.org/10.1016/j.aogh.2016.06.005>
- 679 21. Gertrude N, Kawuma R, Nalukenge W, Kamacooko O, Yperzeele L, Cras P, et al.  
680 Caring for a stroke patient: The burden and experiences of primary caregivers in Uganda  
681 – A qualitative study. Nurs Open [Internet]. 2019 Oct 4 [cited 2022 Aug 30];6(4):1551–  
682 8. Available from: <https://onlinelibrary.wiley.com/doi/10.1002/nop2.356>

- 683 22. Jackson JL, Kuriyama A, Anton A, Choi A, Fournier JP, Geier AK, et al. The Accuracy  
684 of Google Translate for Abstracting Data From Non–English-Language Trials for  
685 Systematic Reviews. *Ann Intern Med* [Internet]. 2019 Nov 5;171(9):677. Available  
686 from: [https://annals.org/aim/fullarticle/2739791/accuracy-google-translate-abstracting-](https://annals.org/aim/fullarticle/2739791/accuracy-google-translate-abstracting-data-from-non-english-language-trials)  
687 [data-from-non-english-language-trials](https://annals.org/aim/fullarticle/2739791/accuracy-google-translate-abstracting-data-from-non-english-language-trials)
- 688 23. Souto RQ, Khanassov V, Hong QN, Bush PL, Vedel I, Pluye P. Systematic mixed  
689 studies reviews: Updating results on the reliability and efficiency of the mixed methods  
690 appraisal tool. *Int J Nurs Stud*. 2015;52(1):500–1.
- 691 24. Pace R, Pluye P, Bartlett G, Macaulay AC, Salsberg J, Jagosh J, et al. Testing the  
692 reliability and efficiency of the pilot Mixed Methods Appraisal Tool (MMAT) for  
693 systematic mixed studies review. *Int J Nurs Stud* [Internet]. 2012 Jan;49(1):47–53.  
694 Available from: <https://linkinghub.elsevier.com/retrieve/pii/S0020748911002665>
- 695 25. Tchokote EC. Vécu des aidants familiaux prodiguant des soins à leurs parents atteints  
696 d'un accident vasculaire cérébral au Cameroun : analyse interprétative  
697 phénoménologique. *Rech Soins Infirm*. 2020 May 25;N° 140(1):97–106.
- 698 26. Serfontein L, Visser M, van Schalkwyk M, van Rooyen C. The perceived burden of care  
699 among caregivers of survivors of cerebrovascular accident following discharge from a  
700 private rehabilitation unit. *South African Journal of Occupational Therapy*. 2019;49(2).
- 701 27. Scheffler E, Mash R. Surviving a stroke in South Africa: outcomes of home-based care  
702 in a low-resource rural setting. *Top Stroke Rehabil* [Internet]. 2019 Aug 18;26(6):423–  
703 34. Available from:  
704 <https://www.tandfonline.com/doi/full/10.1080/10749357.2019.1623473>
- 705 28. Jones MP, Howitt SC, Jusabani A, Gray WK, Aris E, Mugusi F, et al. Anxiety and  
706 depression in incident stroke survivors and their carers in rural Tanzania: A case-control

- 707 follow-up study over five years. *Neurol Psychiatry Brain Res* [Internet]. 2012  
708 Jun;18(3):122–8. Available from:  
709 <https://linkinghub.elsevier.com/retrieve/pii/S0941950012000097>
- 710 29. Yusuf AJ, Adamu A, Nuhu FT. Caregiver burden among poor caregivers of patients  
711 with cancer in an urban African setting. *Psychooncology*. 2011 Aug;20(8):902–5.
- 712 30. Vincent-Onabajo G, Daniel H, Lawan A, Usman Ali M, Ali Masta M, Modu A.  
713 Musculoskeletal Symptoms among Family Caregivers of Community-Dwelling Stroke  
714 Survivors in Nigeria. *J Caring Sci*. 2018 Jun 1;7(2):59–66.
- 715 31. Onyeneho CA, Ilesanmi RE. Burden of Care and Perceived Psycho-Social Outcomes  
716 among Family Caregivers of Patients Living with Cancer. *Asia Pac J Oncol Nurs*. 2021  
717 May;8(3):330–6.
- 718 32. Okeke PC, Oparah SK, Oboke SO, Inem V. Care Burden Correlates with Depression  
719 among Informal Caregivers of Stroke Patients: A Cross Sectional Study in Lagos,  
720 Nigeria. 2020;13(2):1402–10.
- 721 33. Ohaeri JU, Campbell OB, Ilesanmi AO, Omigbodun AO. The psychosocial burden of  
722 caring for some Nigerian women with breast cancer and cervical cancer. *Soc Sci Med*.  
723 1999 Dec;49(11):1541–9.
- 724 34. Ogunmodede AJ, Abiodun O, Makanjuola AB, Olarinoye JK, Ogunmodede JA, Buhari  
725 OI. Burden of Care and Psychological Distress in Primary Caregivers of Patients with  
726 Type -2 Diabetes Mellitus in A Tertiary Hospital in Nigeria. *Ethiop J Health Sci*. 2019  
727 Nov 1;29(6):697–708.
- 728 35. Gbiri CA, Olawale OA, Isaac SO. Stroke management: Informal caregivers' burdens  
729 and strains of caring for stroke survivors. *Ann Phys Rehabil Med* [Internet]. 2015 Apr 1

- 730 [cited 2022 Aug 31];58(2):98–103. Available from:  
731 <https://linkinghub.elsevier.com/retrieve/pii/S187706571401834X>
- 732 36. Duru CO, Okpokowuruk FS, Adesina AD, Worgu GO, Adeniji FO, Chinawa JM, et al.  
733 Caring for Children with Congenital Heart Diseases:Economic Burden of Pre-Surgical  
734 Management on Nigerian Families. *West Afr J Med* [Internet]. 2021;38(2):144–51.  
735 Available from: <http://www.ncbi.nlm.nih.gov/pubmed/33641149>
- 736 37. Akpan-Idiok PA, Anarado AN. Perceptions of burden of caregiving by informal  
737 caregivers of cancer patients attending University of Calabar Teaching Hospital,  
738 Calabar, Nigeria. *Pan African Medical Journal* [Internet]. 2014;18. Available from:  
739 <http://www.panafrican-med-journal.com/content/article/18/159/full/>
- 740 38. Abba MA, Ahmad UA, Maje AU, Haruna AZ, Ibrahim AA. Musculoskeletal Pain and  
741 Associated Factors Among Informal Caregivers of Stroke Survivors in Northwestern  
742 Nigeria. *Modern Care Journal* [Internet]. 2022 May 1;19(2). Available from:  
743 <https://brieflands.com/articles/mcj-123216.html>
- 744 39. Ogunyemi A, Umoru AK, Alabi AO, Adegboyega BC, Otokpa E. Caregiving Burden  
745 among Informal Caregivers of Cancer Patients in Lagos, Nigeria. 2021; Available from:  
746 <https://doi.org/10.21203/rs.3.rs-769222/v1>
- 747 40. Thomas M, Greenop K. CAREGIVER EXPERIENCES AND PERCEPTIONS OF  
748 STROKE. *Vol. 13*. 2008.
- 749 41. Mthembu TG, Brown Z, Cupido A, Razack G, Wassung D. Family caregivers’  
750 perceptions and experiences regarding caring for older adults with chronic diseases.  
751 *South African Journal of Occupational Therapy* [Internet]. 2016;46(1):83–8. Available  
752 from: [http://www.scielo.org.za/scielo.php?script=sci\\_arttext&pid=S2310-](http://www.scielo.org.za/scielo.php?script=sci_arttext&pid=S2310-38332016000100015)  
753 [38332016000100015](http://www.scielo.org.za/scielo.php?script=sci_arttext&pid=S2310-38332016000100015)

- 754 42. Mlaba PC, Ginindza T, Hlongwana K. Family caregivers' perspectives of the economic  
755 burden imposed through caring for family members with cancer in KwaZulu-Natal,  
756 South Africa. *Southern African Journal of Social Work and Social Development*.  
757 2020;32(3).
- 758 43. Mlaba PC, Ginindza TG, Hlongwana KW. The social burden experienced by families  
759 caring for members living with cancer in KwaZulu-Natal, South Africa. *Afr J Prim*  
760 *Health Care Fam Med* [Internet]. 2021 Oct 25;13(1):1–10. Available from:  
761 <http://www.phcfm.org/index.php/PHCFM/article/view/2955>
- 762 44. Masuku KP, Mophosho M, Tshabalala M. 'I felt pain. Deep pain...': Experiences of  
763 primary caregivers of stroke survivors with aphasia in a South African township. *Afr J*  
764 *Disabil* [Internet]. 2018 Mar 8;7. Available from:  
765 <https://ajod.org/index.php/ajod/article/view/368>
- 766 45. Ketlogetswe TS, Jansen Van Rensburg JJ, Maree JE. The experiences of caregivers of  
767 patients living with cancer admitted to a hospice in South Africa. *Int J Palliat Nurs*  
768 [Internet]. 2022 Apr 2;28(4):164–71. Available from:  
769 <http://www.magonlinelibrary.com/doi/10.12968/ijpn.2022.28.4.164>
- 770 46. Gawulayo S, Erasmus CJ, Rhoda AJ. Family functioning and stroke: Family members'  
771 perspectives. *Afr J Disabil* [Internet]. 2021 Oct 25;10. Available from:  
772 <http://www.ajod.org/index.php/AJOD/article/view/801>
- 773 47. Dhada B, Blackbeard D. Caregivers of children with diabetes mellitus: challenges of  
774 caring for and perceptions of consultations in a South African public sector context.  
775 *South African Family Practice* [Internet]. 2019 Aug 23;61(4):117–35. Available from:  
776 <https://www.tandfonline.com/doi/full/10.1080/20786190.2019.1606491>

- 777 48. Bessa Y, Moore A, Amey F. Caring for a Loved One with Cancer: It Is My Job. *J*  
778 *Psychosoc Oncol* [Internet]. 2012 Mar;30(2):217–38. Available from:  
779 <http://www.tandfonline.com/doi/abs/10.1080/07347332.2011.644397>
- 780 49. Marima P, Gunduza R, Machando D, Dambi JM. Correlates of social support on report  
781 of probable common mental disorders in Zimbabwean informal caregivers of patients  
782 with stroke: a cross-sectional survey. *BMC Res Notes* [Internet]. 2019 Dec  
783 16;12(1):514. Available from:  
784 <https://bmresnotes.biomedcentral.com/articles/10.1186/s13104-019-4551-2>
- 785 50. Muriuki MM, Oluchina S, Mbithi BW. Assessment of role strain among family  
786 caregivers of adult patients with cancer at a national referral hospital in Kenya.  
787 *Psychooncology* [Internet]. 2023 Jan 30 [cited 2023 Jul 31];32(1):42–6. Available from:  
788 <https://onlinelibrary.wiley.com/doi/10.1002/pon.5868>
- 789 51. Yousif M, Abdelrahman A, Al Jamea LH, Al-Yami FS, Woodman A. Psychosocial  
790 Impact of Sickle Cell Disease and Diabetes Mellitus on Affected Children and Their  
791 Parents in Khartoum State, Sudan. *J Trop Pediatr* [Internet]. 2022 Apr 5;68(3). Available  
792 from: <https://academic.oup.com/tropej/article/doi/10.1093/tropej/fmac042/6596143>
- 793 52. Kitoko GM Bin, Vivalya BMN, Vagheni MM, Matonda Ma Nzuzi T, Mampunza  
794 Lusambulu S, Lelo GM, et al. Psychological burden in stroke survivors and caregivers  
795 dyads at the rehabilitation center of Kinshasa (Democratic Republic of Congo): A cross-  
796 sectional study. *Journal of Stroke and Cerebrovascular Diseases* [Internet]. 2022  
797 Jun;31(6):106447. Available from:  
798 <https://linkinghub.elsevier.com/retrieve/pii/S1052305722001434>

- 799 53. Owoo B, Ninnoni JP, Ampofo EA, Seidu AA. Challenges encountered by family  
800 caregivers of prostate cancer patients in Cape Coast, Ghana: a descriptive  
801 phenomenological study. *BMC Palliat Care*. 2022 Dec 14;21(1):108.
- 802 54. Owoo B, Ninnoni JPK, Ampofo EA, Seidu AA. “I always find myself very tired and  
803 exhausted”: The physical impact of caring; a descriptive phenomenological study of the  
804 experiences of prostate cancer caregivers in Cape Coast, Ghana. *PLoS One*. 2022 Jul  
805 26;17(7):e0268627.
- 806 55. Ababacar MK, Assane S, Saliou MS, Ousmane C, Kamadore T, Mamadou K.  
807 Psychosocial and Economic Evaluation of Stroke Management in the Elderly: A  
808 Prospective Study at the Neurology Department in a Hospital in Dakar, Senegal. *Acta  
809 Scientific MEDICAL SCIENCES*. 2022;6(6).
- 810 56. Wassie LA, Azagew AW, Biftu BB. Depression and its associated factors among  
811 primary caregivers of adult cancer patients at Northwest Amhara Regional States  
812 Referrals Hospitals oncology treatment units, Northwest Ethiopia, 2021. *BMC  
813 Psychiatry*. 2022 Aug 6;22(1):533.
- 814 57. Muliira JK, Kizza IB. The other untold burden of cancer in sub-Saharan Africa: Anxiety  
815 and depressive symptoms among family caregivers of adult cancer patients. *Int J Afr  
816 Nurs Sci* [Internet]. 2019;11:100166. Available from:  
817 <https://linkinghub.elsevier.com/retrieve/pii/S2214139118301525>
- 818 58. Malangwa G, Mangi EJ. Psychological Distress Factors among Caregivers of Children  
819 Receiving Cancer Therapy, at Muhimbili National Hospital. *East African Health  
820 Research Journal*. 2022 Jul 27;6(1):70–7.
- 821 59. BeLue R, Ndiaye K, Miranda P, Ndao F, Canagarajah P. Diabetes management in  
822 Senegalese families: A dyadic-narrative illustration. *Chronic Illn* [Internet]. 2018 Sep

- 823 1;14(3):182–93. Available from:  
824 <http://journals.sagepub.com/doi/10.1177/1742395317719141>
- 825 60. Katende G, Nakimera L. Prevalence and correlates of anxiety and depression among  
826 family carers of cancer patients in a cancer care and treatment facility in Uganda: a  
827 cross-sectional study. *Afr Health Sci* [Internet]. 2017 Sep 18 [cited 2022 Aug  
828 30];17(3):868. Available from: [/pmc/articles/PMC5656193/](https://pubmed.ncbi.nlm.nih.gov/305656193/)
- 829 61. Mekonnen H, Gebreyohannis GT, Cherie A. Depression and associated factors among  
830 parents of children diagnosed with cancer at Tikur Anbessa Specialized Hospital, Addis  
831 Ababa, Ethiopia. *Psychooncology* [Internet]. 2020 Jul 3;29(7):1141–7. Available from:  
832 <https://onlinelibrary.wiley.com/doi/10.1002/pon.5389>
- 833 62. Masika GM, Gottvall M, Kohi TW, von Essen L, Dol JS. Concerns and Needs of  
834 Support Among Guardians of Children on Cancer Treatment in Dar es Salaam: A  
835 Qualitative Study. *Cancer Nurs* [Internet]. 2020 Nov;43(6):E342–8. Available from:  
836 <https://journals.lww.com/10.1097/NCC.0000000000000722>
- 837 63. Esmaili BE, Stewart KA, Masalu NA, Schroeder KM. Qualitative Analysis of Palliative  
838 Care for Pediatric Patients With Cancer at Bugando Medical Center: An Evaluation of  
839 Barriers to Providing End-of-Life Care in a Resource-Limited Setting. *J Glob Oncol*  
840 [Internet]. 2018 Dec;(4):1–10. Available from:  
841 <https://ascopubs.org/doi/10.1200/JGO.17.00047>
- 842 64. Bekui BAA, Ohene LA, Badzi C, Ampomah MO, Aziato L. Physical and socioeconomic  
843 burden of caregiving on family caregivers of children with cancer at a tertiary Hospital  
844 in Ghana. *Nurs Open* [Internet]. 2023 Feb 20;10(2):915–25. Available from:  
845 <https://onlinelibrary.wiley.com/doi/10.1002/nop2.1359>



- 846 65. Vouking MZ, Takougang I, Mbam LM, Mbuagbaw L, Tadenfok CN, Tamo CV. The  
847 contribution of community health workers to the control of Buruli ulcer in the Ngoantet  
848 area, Cameroon. *Pan African Medical Journal* [Internet]. 2013 [cited 2019 Jun  
849 29];16:63. Available from: <http://www.ncbi.nlm.nih.gov/pubmed/24711863>
- 850 66. Mensah ABB, Adamu B, Mensah KB, Dzomeku VM, Agbadi P, Kusi G, et al.  
851 Exploring the social stressors and resources of husbands of women diagnosed with  
852 advanced breast cancer in their role as primary caregivers in Kumasi, Ghana. *Supportive  
853 Care in Cancer* [Internet]. 2021 May 11;29(5):2335–45. Available from:  
854 <https://link.springer.com/10.1007/s00520-020-05716-2>
- 855 67. Dawson CP, Aryeetey GC, Agyemang SA, Mensah K, Addo R, Nonvignon J. Costs,  
856 burden and quality of life associated with informal caregiving for children with  
857 Lymphoma attending a tertiary hospital in Ghana. *Int J Care Coord* [Internet]. 2020 Dec  
858 4;23(4):165–72. Available from:  
859 <http://journals.sagepub.com/doi/10.1177/2053434520981357>
- 860 68. Khondowe O, Rhoda A, Mpofu R. Perceived needs of caregivers of stroke patients’  
861 receiving out-patient physiotherapy treatment in Lusaka, Zambia. *South African Journal  
862 of Physiotherapy* [Internet]. 2007 Feb 18;63(1). Available from:  
863 <http://sajp.co.za/index.php/sajp/article/view/122>
- 864 69. Greenwood N, Smith R. Motivations for being informal carers of people living with  
865 dementia: a systematic review of qualitative literature. *BMC Geriatr* [Internet]. 2019  
866 Dec 17;19(1):169. Available from:  
867 <https://bmcgeriatr.biomedcentral.com/articles/10.1186/s12877-019-1185-0>

- 868 70. Evans R. Children as Caregivers. In: Handbook of Child Well-Being [Internet].  
869 Dordrecht: Springer Netherlands; 2014. p. 1893–916. Available from:  
870 [http://link.springer.com/10.1007/978-90-481-9063-8\\_173](http://link.springer.com/10.1007/978-90-481-9063-8_173)
- 871 71. Afriyie DO, Nyoni J, Ahmat A. The state of strategic plans for the health workforce in  
872 Africa. *BMJ Glob Health*. 2019;4(Suppl 9):e001115.
- 873 72. Anyangwe SCE, Mtonga C. Inequities in the global health workforce: The greatest  
874 impediment to health in Sub-Saharan Africa. *Int J Environ Res Public Health*.  
875 2007;4(2):93–100.
- 876 73. Mosquera I, Vergara I, Larrañaga I, Machón M, del Río M, Calderón C. Measuring the  
877 impact of informal elderly caregiving: a systematic review of tools. *Quality of Life*  
878 *Research*. 2016 May 16;25(5):1059–92.
- 879 74. Tedeschi RG, Calhoun LG. The posttraumatic growth inventory: Measuring the positive  
880 legacy of trauma. *J Trauma Stress*. 1996;9(3):455–71.
- 881 75. Nouzari R, Najafi SS, Momennasab M. Post-Traumatic Growth among Family  
882 Caregivers of Cancer Patients and Its Association with Social Support and Hope. *Int J*  
883 *Community Based Nurs Midwifery*. 2019 Oct;7(4):319–28.
- 884 76. Gil-González I, Pérez-San-Gregorio MÁ, Funuyet-Salas J, Conrad R, Martín-Rodríguez  
885 A. Significance of Post-Traumatic Growth and Mental Health for Coping in Multiple  
886 Sclerosis Caregivers. *Healthcare*. 2023 May 11;11(10):1390.
- 887 77. Ni ZH, Lv HT, Wu JH, Wang F. Post-traumatic growth in caregivers of children  
888 hospitalized in the PICU due to traffic accident: a qualitative study. *BMC Nurs*. 2023  
889 Feb 23;22(1):48.

- 890 78. Longacre ML, Valdmanis VG, Handorf EA, Fang CY. Work Impact and Emotional  
891 Stress Among Informal Caregivers for Older Adults. *J Gerontol B Psychol Sci Soc Sci*  
892 [Internet]. 2016 Apr 5;gbw027. Available from:  
893 [https://academic.oup.com/psychsocgerontology/article-](https://academic.oup.com/psychsocgerontology/article-lookup/doi/10.1093/geronb/gbw027)  
894 [lookup/doi/10.1093/geronb/gbw027](https://academic.oup.com/psychsocgerontology/article-lookup/doi/10.1093/geronb/gbw027)
- 895 79. McEwen BS, Stellar E. Stress and the Individual: Mechanisms Leading to Disease. *Arch*  
896 *Intern Med* [Internet]. 1993 Sep 27;153(18):2093–101. Available from:  
897 [http://archinte.jamanetwork.com/article.aspx?doi=10.1001/archinte.1993.004101800390](http://archinte.jamanetwork.com/article.aspx?doi=10.1001/archinte.1993.00410180039004)  
898 04
- 899 80. Stoll CRT, Izadi S, Fowler S, Green P, Suls J, Colditz GA. The value of a second  
900 reviewer for study selection in systematic reviews. *Res Synth Methods* [Internet]. 2019  
901 Dec 18;10(4):539–45. Available from:  
902 <https://onlinelibrary.wiley.com/doi/10.1002/jrsm.1369>

903

904

## 905 **Supporting Information**

906 **S1 Fig. PRISMA flow diagram of the screening and selection process in this review.**

907 **S1 File. Search strategy used in the selected databases.**

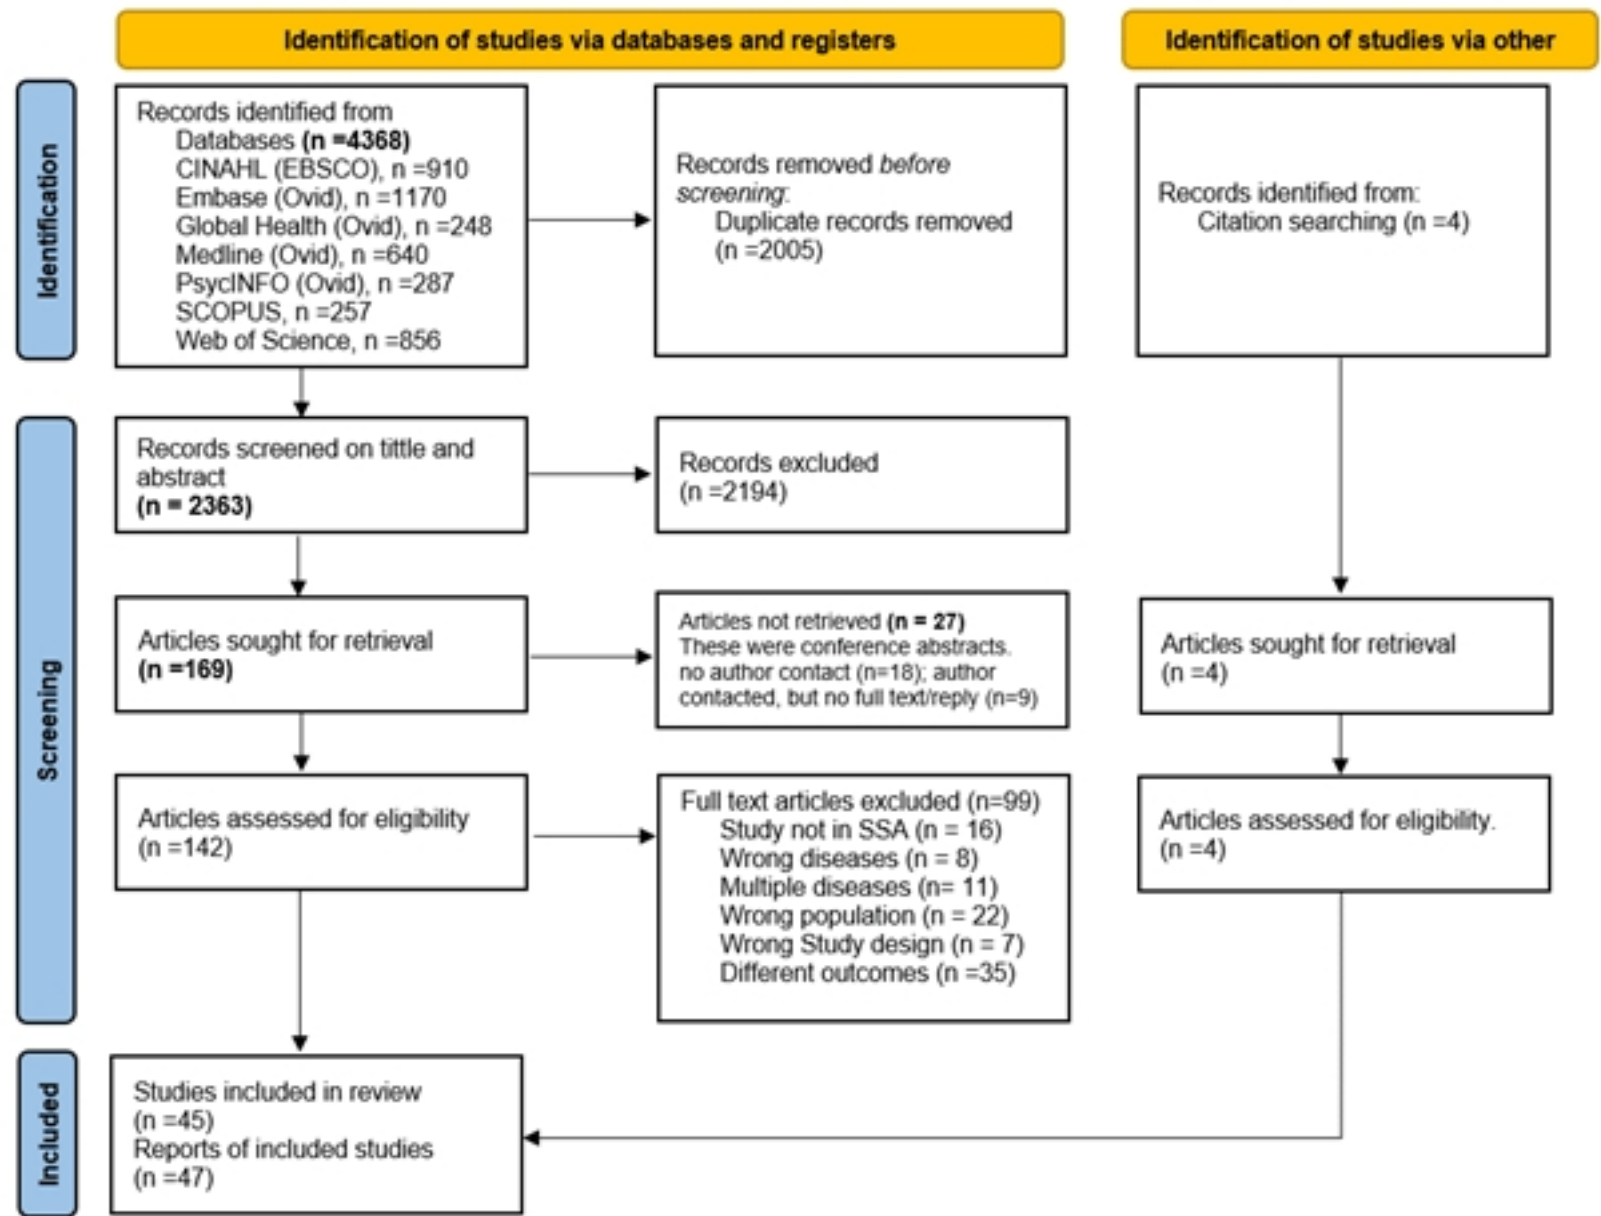

Fig 1. PRISMA flow diagram of the screening
